# Supplementary material for: Trypanosoma cruzi and Toxoplasma gondii Induce a Differential MicroRNA Profile in Human Placental Explants
Source: Front Immunol. 2020 Nov 6;11:595250. doi: 10.3389/fimmu.2020.595250 (PMC7677230; doi:10.3389/fimmu.2020.595250)
Supplement: Supplementary file 2 [file Table_2.xlsx]

## Sheet: Hoja1
Best scored target genes of the 14 DEMs from T. cruzi vs. Control HPE
miRNA Name	Gene Symbol	Gene Description
hsa-miR-636	ONECUT2	one cut homeobox 2
hsa-miR-636	GLCE	glucuronic acid epimerase
hsa-miR-636	PIEZO2	piezo type mechanosensitive ion channel component 2
hsa-miR-636	CETN2	centrin 2
hsa-miR-636	ARID4B	AT-rich interaction domain 4B
hsa-miR-636	TPD52	tumor protein D52
hsa-miR-636	JMY	junction mediating and regulatory protein, p53 cofactor
hsa-miR-636	VAT1	vesicle amine transport 1
hsa-miR-636	LDOC1	LDOC1, regulator of NFKB signaling
hsa-miR-636	MAST4	microtubule associated serine/threonine kinase family member 4
hsa-miR-636	GRIP1	glutamate receptor interacting protein 1
hsa-miR-636	RNF165	ring finger protein 165
hsa-miR-636	AP3M1	adaptor related protein complex 3 subunit mu 1
hsa-miR-636	HAPLN1	hyaluronan and proteoglycan link protein 1
hsa-miR-636	SFRP2	secreted frizzled related protein 2
hsa-miR-636	VSIG10	V-set and immunoglobulin domain containing 10
hsa-miR-636	ANKRD44	ankyrin repeat domain 44
hsa-miR-636	MOSPD1	motile sperm domain containing 1
hsa-miR-636	BRINP3	BMP/retinoic acid inducible neural specific 3
hsa-miR-636	FGF12	fibroblast growth factor 12
hsa-miR-636	GASK1B	golgi associated kinase 1B
hsa-miR-636	RPS6KA2	ribosomal protein S6 kinase A2
hsa-miR-636	RUNX2	runt related transcription factor 2
hsa-miR-636	SHTN1	shootin 1
hsa-miR-636	FCHO2	FCH domain only 2
hsa-miR-636	COLGALT1	collagen beta(1-O)galactosyltransferase 1
hsa-miR-636	NRXN1	neurexin 1
hsa-miR-636	NPY1R	neuropeptide Y receptor Y1
hsa-miR-636	C3orf70	chromosome 3 open reading frame 70
hsa-miR-636	RAP1A	RAP1A, member of RAS oncogene family
hsa-miR-636	CHST8	carbohydrate sulfotransferase 8
hsa-miR-636	HOXD10	homeobox D10
hsa-miR-636	KLF9	Kruppel like factor 9
hsa-miR-636	ACSL1	acyl-CoA synthetase long chain family member 1
hsa-miR-636	YTHDF3	YTH N6-methyladenosine RNA binding protein 3
hsa-miR-636	CDC42SE2	CDC42 small effector 2
hsa-miR-636	RICTOR	RPTOR independent companion of MTOR complex 2
hsa-miR-636	TMEM25	transmembrane protein 25
hsa-miR-636	EBF3	EBF transcription factor 3
hsa-miR-636	ITGA9	integrin subunit alpha 9
hsa-miR-636	SEMA4A	semaphorin 4A
hsa-miR-636	HIVEP1	human immunodeficiency virus type I enhancer binding protein 1
hsa-miR-636	COMMD3-BMI1	COMMD3-BMI1 readthrough
hsa-miR-636	SFMBT1	Scm like with four mbt domains 1
hsa-miR-636	PHC3	polyhomeotic homolog 3
hsa-miR-636	PNPLA8	patatin like phospholipase domain containing 8
hsa-miR-636	SAXO2	stabilizer of axonemal microtubules 2
hsa-miR-636	NEURL4	neuralized E3 ubiquitin protein ligase 4
hsa-miR-636	KCNH1	potassium voltage-gated channel subfamily H member 1
hsa-miR-636	RBPJ	recombination signal binding protein for immunoglobulin kappa J region
hsa-miR-4449	ICOS	inducible T cell costimulator
hsa-miR-4449	TOMM40	translocase of outer mitochondrial membrane 40
hsa-miR-4449	RPL10	ribosomal protein L10
hsa-miR-4449	MUCL3	mucin like 3
hsa-miR-4449	PREX1	phosphatidylinositol-3,4,5-trisphosphate dependent Rac exchange factor 1
hsa-miR-4449	PTPRE	protein tyrosine phosphatase, receptor type E
hsa-miR-4449	SMAD4	SMAD family member 4
hsa-miR-4449	MRGBP	MRG domain binding protein
hsa-miR-4449	IL7R	interleukin 7 receptor
hsa-miR-4449	RBM4	RNA binding motif protein 4
hsa-miR-4449	ALDH1A3	aldehyde dehydrogenase 1 family member A3
hsa-miR-4449	PTK6	protein tyrosine kinase 6
hsa-miR-4449	CYSRT1	cysteine rich tail 1
hsa-miR-4449	HOXB9	homeobox B9
hsa-miR-4449	FAM53C	family with sequence similarity 53 member C
hsa-miR-4449	SURF6	surfeit 6
hsa-miR-4449	KBTBD12	kelch repeat and BTB domain containing 12
hsa-miR-4449	RASGRF2	Ras protein specific guanine nucleotide releasing factor 2
hsa-miR-4449	DUSP13	dual specificity phosphatase 13
hsa-miR-4449	KEAP1	kelch like ECH associated protein 1
hsa-miR-4449	ZNF512B	zinc finger protein 512B
hsa-miR-4449	LRFN1	leucine rich repeat and fibronectin type III domain containing 1
hsa-miR-4449	SOCS3	suppressor of cytokine signaling 3
hsa-miR-4449	NEU1	neuraminidase 1
hsa-miR-4449	TCF15	transcription factor 15
hsa-miR-4449	C10orf142	chromosome 10 open reading frame 142
hsa-miR-4449	VENTX	VENT homeobox
hsa-miR-4449	CBX7	chromobox 7
hsa-miR-4449	CDK5R2	cyclin dependent kinase 5 regulatory subunit 2
hsa-miR-449a	HCN3	hyperpolarization activated cyclic nucleotide gated potassium channel 3
hsa-miR-449a	FAM167A	family with sequence similarity 167 member A
hsa-miR-449a	RAP1GDS1	Rap1 GTPase-GDP dissociation stimulator 1
hsa-miR-449a	DLL1	delta like canonical Notch ligand 1
hsa-miR-449a	FAM76A	family with sequence similarity 76 member A
hsa-miR-449a	SDK2	sidekick cell adhesion molecule 2
hsa-miR-449a	MDM4	MDM4, p53 regulator
hsa-miR-449a	E2F5	E2F transcription factor 5
hsa-miR-449a	SYT1	synaptotagmin 1
hsa-miR-449a	SCN2B	sodium voltage-gated channel beta subunit 2
hsa-miR-449a	NAV3	neuron navigator 3
hsa-miR-449a	MGAT4A	alpha-1,3-mannosyl-glycoprotein 4-beta-N-acetylglucosaminyltransferase A
hsa-miR-449a	FKBP1B	FKBP prolyl isomerase 1B
hsa-miR-449a	PPP1R11	protein phosphatase 1 regulatory inhibitor subunit 11
hsa-miR-449a	SATB2	SATB homeobox 2
hsa-miR-449a	MET	MET proto-oncogene, receptor tyrosine kinase
hsa-miR-449a	LGR4	leucine rich repeat containing G protein-coupled receptor 4
hsa-miR-449a	TGIF2	TGFB induced factor homeobox 2
hsa-miR-449a	MYCN	MYCN proto-oncogene, bHLH transcription factor
hsa-miR-449a	XYLT1	xylosyltransferase 1
hsa-miR-449a	NECTIN1	nectin cell adhesion molecule 1
hsa-miR-449a	NAV1	neuron navigator 1
hsa-miR-449a	FLOT2	flotillin 2
hsa-miR-449a	CELF3	CUGBP Elav-like family member 3
hsa-miR-449a	PACS1	phosphofurin acidic cluster sorting protein 1
hsa-miR-449a	VAMP2	vesicle associated membrane protein 2
hsa-miR-449a	PKP4	plakophilin 4
hsa-miR-449a	CACNA1E	calcium voltage-gated channel subunit alpha1 E
hsa-miR-449a	RRAS	RAS related
hsa-miR-449a	SHANK3	SH3 and multiple ankyrin repeat domains 3
hsa-miR-449a	ABR	ABR, RhoGEF and GTPase activating protein
hsa-miR-449a	AHCYL2	adenosylhomocysteinase like 2
hsa-miR-449a	FUT9	fucosyltransferase 9
hsa-miR-449a	SLC25A27	solute carrier family 25 member 27
hsa-miR-449a	PITPNC1	phosphatidylinositol transfer protein cytoplasmic 1
hsa-miR-449a	MPP2	membrane palmitoylated protein 2
hsa-miR-449a	CAMTA1	calmodulin binding transcription activator 1
hsa-miR-449a	MLLT3	MLLT3, super elongation complex subunit
hsa-miR-449a	NPNT	nephronectin
hsa-miR-449a	CYREN	cell cycle regulator of NHEJ
hsa-miR-449a	TBL1XR1	transducin beta like 1 X-linked receptor 1
hsa-miR-449a	SRPRA	SRP receptor subunit alpha
hsa-miR-449a	FUT8	fucosyltransferase 8
hsa-miR-449a	MEX3C	mex-3 RNA binding family member C
hsa-miR-449a	TPPP	tubulin polymerization promoting protein
hsa-miR-449a	TOB2	transducer of ERBB2, 2
hsa-miR-449a	FOXP1	forkhead box P1
hsa-miR-449a	CUEDC1	CUE domain containing 1
hsa-miR-449a	SNAI1	snail family transcriptional repressor 1
hsa-miR-449a	TMEM255A	transmembrane protein 255A
hsa-miR-490-5p	SHISA7	shisa family member 7
hsa-miR-490-5p	FOS	Fos proto-oncogene, AP-1 transcription factor subunit
hsa-miR-490-5p	TTC29	tetratricopeptide repeat domain 29
hsa-miR-490-5p	YWHAB	tyrosine 3-monooxygenase/tryptophan 5-monooxygenase activation protein beta
hsa-miR-490-5p	ALDH1A2	aldehyde dehydrogenase 1 family member A2
hsa-miR-490-5p	GCH1	GTP cyclohydrolase 1
hsa-miR-490-5p	SPRED3	sprouty related EVH1 domain containing 3
hsa-miR-490-5p	WDR44	WD repeat domain 44
hsa-miR-490-5p	APPL1	adaptor protein, phosphotyrosine interacting with PH domain and leucine zipper 1
hsa-miR-490-5p	CXorf56	chromosome X open reading frame 56
hsa-miR-490-5p	CST8	cystatin 8
hsa-miR-490-5p	TOX3	TOX high mobility group box family member 3
hsa-miR-490-5p	C1orf43	chromosome 1 open reading frame 43
hsa-miR-490-5p	LMOD1	leiomodin 1
hsa-miR-490-5p	ALG10B	ALG10B, alpha-1,2-glucosyltransferase
hsa-miR-490-5p	ARPP19	cAMP regulated phosphoprotein 19
hsa-miR-490-5p	ADCYAP1	adenylate cyclase activating polypeptide 1
hsa-miR-490-5p	BAZ2B	bromodomain adjacent to zinc finger domain 2B
hsa-miR-490-5p	CNTN3	contactin 3
hsa-miR-490-5p	HPS5	HPS5, biogenesis of lysosomal organelles complex 2 subunit 2
hsa-miR-490-5p	LAMTOR3	late endosomal/lysosomal adaptor, MAPK and MTOR activator 3
hsa-miR-490-5p	ZNF347	zinc finger protein 347
hsa-miR-490-5p	TAOK1	TAO kinase 1
hsa-miR-490-5p	COLEC11	collectin subfamily member 11
hsa-miR-490-5p	FAM84A	family with sequence similarity 84 member A
hsa-miR-490-5p	RANBP10	RAN binding protein 10
hsa-miR-490-5p	INHBC	inhibin subunit beta C
hsa-miR-490-5p	SERPINB10	serpin family B member 10
hsa-miR-490-5p	USP37	ubiquitin specific peptidase 37
hsa-miR-490-5p	P4HA1	prolyl 4-hydroxylase subunit alpha 1
hsa-miR-490-5p	PKD2	polycystin 2, transient receptor potential cation channel
hsa-miR-490-5p	NBR1	NBR1, autophagy cargo receptor
hsa-miR-490-5p	KIRREL1	kirre like nephrin family adhesion molecule 1
hsa-miR-490-5p	GPALPP1	GPALPP motifs containing 1
hsa-miR-490-5p	ARHGAP26	Rho GTPase activating protein 26
hsa-miR-490-5p	C11orf58	chromosome 11 open reading frame 58
hsa-miR-490-5p	RTL3	retrotransposon Gag like 3
hsa-miR-490-5p	ADGRF3	adhesion G protein-coupled receptor F3
hsa-miR-490-5p	BORA	bora, aurora kinase A activator
hsa-miR-490-5p	COA5	cytochrome c oxidase assembly factor 5
hsa-miR-490-5p	ARHGAP42	Rho GTPase activating protein 42
hsa-miR-490-5p	EMCN	endomucin
hsa-miR-490-5p	ZEB2	zinc finger E-box binding homeobox 2
hsa-miR-490-5p	UNC80	unc-80 homolog, NALCN channel complex subunit
hsa-miR-490-5p	LCOR	ligand dependent nuclear receptor corepressor
hsa-miR-490-5p	F8A1	coagulation factor VIII associated 1
hsa-miR-490-5p	WLS	Wnt ligand secretion mediator
hsa-miR-490-5p	STAT5B	signal transducer and activator of transcription 5B
hsa-miR-490-5p	ZNF770	zinc finger protein 770
hsa-miR-490-5p	SHISA9	shisa family member 9
hsa-miR-2115-5p	KCNIP1	potassium voltage-gated channel interacting protein 1
hsa-miR-2115-5p	CSNK1G3	casein kinase 1 gamma 3
hsa-miR-2115-5p	ZKSCAN2	zinc finger with KRAB and SCAN domains 2
hsa-miR-2115-5p	FAM84B	family with sequence similarity 84 member B
hsa-miR-2115-5p	CADM2	cell adhesion molecule 2
hsa-miR-2115-5p	ZFP91	ZFP91 zinc finger protein
hsa-miR-2115-5p	SFT2D2	SFT2 domain containing 2
hsa-miR-2115-5p	ABHD17A	abhydrolase domain containing 17A
hsa-miR-2115-5p	KIAA1549	KIAA1549
hsa-miR-2115-5p	DPH3P1	diphthamide biosynthesis 3 pseudogene 1
hsa-miR-2115-5p	TFCP2L1	transcription factor CP2 like 1
hsa-miR-2115-5p	ONECUT2	one cut homeobox 2
hsa-miR-2115-5p	NPAS3	neuronal PAS domain protein 3
hsa-miR-2115-5p	TAF5	TATA-box binding protein associated factor 5
hsa-miR-2115-5p	ADAMTS17	ADAM metallopeptidase with thrombospondin type 1 motif 17
hsa-miR-2115-5p	C5orf49	chromosome 5 open reading frame 49
hsa-miR-2115-5p	NGF	nerve growth factor
hsa-miR-2115-5p	BTF3L4	basic transcription factor 3 like 4
hsa-miR-2115-5p	ATL3	atlastin GTPase 3
hsa-miR-2115-5p	ZC2HC1C	zinc finger C2HC-type containing 1C
hsa-miR-2115-5p	SREK1	splicing regulatory glutamic acid and lysine rich protein 1
hsa-miR-2115-5p	TFAP2A	transcription factor AP-2 alpha
hsa-miR-2115-5p	PHF20	PHD finger protein 20
hsa-miR-2115-5p	MID2	midline 2
hsa-miR-2115-5p	NAV2	neuron navigator 2
hsa-miR-2115-5p	CERS6	ceramide synthase 6
hsa-miR-2115-5p	USP49	ubiquitin specific peptidase 49
hsa-miR-2115-5p	TTPAL	alpha tocopherol transfer protein like
hsa-miR-2115-5p	ZNF367	zinc finger protein 367
hsa-miR-2115-5p	RFWD3	ring finger and WD repeat domain 3
hsa-miR-2115-5p	ZFAND5	zinc finger AN1-type containing 5
hsa-miR-2115-5p	IQGAP1	IQ motif containing GTPase activating protein 1
hsa-miR-2115-5p	TEAD1	TEA domain transcription factor 1
hsa-miR-2115-5p	GOSR2	golgi SNAP receptor complex member 2
hsa-miR-2115-5p	TCF7L2	transcription factor 7 like 2
hsa-miR-2115-5p	IQSEC2	IQ motif and Sec7 domain 2
hsa-miR-2115-5p	CXADR	CXADR, Ig-like cell adhesion molecule
hsa-miR-2115-5p	VGLL3	vestigial like family member 3
hsa-miR-2115-5p	MIER3	MIER family member 3
hsa-miR-2115-5p	JAZF1	JAZF zinc finger 1
hsa-miR-2115-5p	ATXN2	ataxin 2
hsa-miR-2115-5p	ARID4A	AT-rich interaction domain 4A
hsa-miR-2115-5p	SSBP3	single stranded DNA binding protein 3
hsa-miR-2115-5p	DPH3	diphthamide biosynthesis 3
hsa-miR-2115-5p	PURB	purine rich element binding protein B
hsa-miR-2115-5p	KLRC4-KLRK1	KLRC4-KLRK1 readthrough
hsa-miR-2115-5p	RC3H2	ring finger and CCCH-type domains 2
hsa-miR-2115-5p	SPRED1	sprouty related EVH1 domain containing 1
hsa-miR-2115-5p	ARHGAP19	Rho GTPase activating protein 19
hsa-miR-2115-5p	KLRK1	killer cell lectin like receptor K1
hsa-miR-497-5p	PAPPA	pappalysin 1
hsa-miR-497-5p	FASN	fatty acid synthase
hsa-miR-497-5p	UNC80	unc-80 homolog, NALCN channel complex subunit
hsa-miR-497-5p	FGF2	fibroblast growth factor 2
hsa-miR-497-5p	TNRC6B	trinucleotide repeat containing 6B
hsa-miR-497-5p	PTPN4	protein tyrosine phosphatase, non-receptor type 4
hsa-miR-497-5p	PHF19	PHD finger protein 19
hsa-miR-497-5p	UBE2Q1	ubiquitin conjugating enzyme E2 Q1
hsa-miR-497-5p	LSM11	LSM11, U7 small nuclear RNA associated
hsa-miR-497-5p	ANKUB1	ankyrin repeat and ubiquitin domain containing 1
hsa-miR-497-5p	CCNE1	cyclin E1
hsa-miR-497-5p	ATG14	autophagy related 14
hsa-miR-497-5p	SLC13A3	solute carrier family 13 member 3
hsa-miR-497-5p	ARIH1	ariadne RBR E3 ubiquitin protein ligase 1
hsa-miR-497-5p	BTRC	beta-transducin repeat containing E3 ubiquitin protein ligase
hsa-miR-497-5p	SPRYD3	SPRY domain containing 3
hsa-miR-497-5p	ARL2	ADP ribosylation factor like GTPase 2
hsa-miR-497-5p	CASK	calcium/calmodulin dependent serine protein kinase
hsa-miR-497-5p	NUP50	nucleoporin 50
hsa-miR-497-5p	DCLK1	doublecortin like kinase 1
hsa-miR-497-5p	DESI1	desumoylating isopeptidase 1
hsa-miR-497-5p	ZBTB46	zinc finger and BTB domain containing 46
hsa-miR-497-5p	FGF7	fibroblast growth factor 7
hsa-miR-497-5p	RECK	reversion inducing cysteine rich protein with kazal motifs
hsa-miR-497-5p	AXIN2	axin 2
hsa-miR-497-5p	GPR63	G protein-coupled receptor 63
hsa-miR-497-5p	SYNJ1	synaptojanin 1
hsa-miR-497-5p	NECTIN1	nectin cell adhesion molecule 1
hsa-miR-497-5p	GAREM1	GRB2 associated regulator of MAPK1 subtype 1
hsa-miR-497-5p	ABL2	ABL proto-oncogene 2, non-receptor tyrosine kinase
hsa-miR-497-5p	FBXO21	F-box protein 21
hsa-miR-497-5p	C2orf42	chromosome 2 open reading frame 42
hsa-miR-497-5p	KIF1B	kinesin family member 1B
hsa-miR-497-5p	LUZP1	leucine zipper protein 1
hsa-miR-497-5p	SPRED1	sprouty related EVH1 domain containing 1
hsa-miR-497-5p	TBL1XR1	transducin beta like 1 X-linked receptor 1
hsa-miR-497-5p	SLC11A2	solute carrier family 11 member 2
hsa-miR-497-5p	MOB3B	MOB kinase activator 3B
hsa-miR-497-5p	ZBTB44	zinc finger and BTB domain containing 44
hsa-miR-497-5p	DMPK	DM1 protein kinase
hsa-miR-497-5p	MGAT4A	alpha-1,3-mannosyl-glycoprotein 4-beta-N-acetylglucosaminyltransferase A
hsa-miR-497-5p	EPHB2	EPH receptor B2
hsa-miR-497-5p	ANO3	anoctamin 3
hsa-miR-497-5p	SLC9A6	solute carrier family 9 member A6
hsa-miR-497-5p	APLN	apelin
hsa-miR-497-5p	IPO7	importin 7
hsa-miR-497-5p	RASGEF1B	RasGEF domain family member 1B
hsa-miR-497-5p	ATG9A	autophagy related 9A
hsa-miR-497-5p	CPEB2	cytoplasmic polyadenylation element binding protein 2
hsa-miR-497-5p	AHCYL2	adenosylhomocysteinase like 2
hsa-miR-561-3p	ARIH1	ariadne RBR E3 ubiquitin protein ligase 1
hsa-miR-561-3p	MED14	mediator complex subunit 14
hsa-miR-561-3p	ACTR2	ARP2 actin related protein 2 homolog
hsa-miR-561-3p	ACVR2A	activin A receptor type 2A
hsa-miR-561-3p	C16orf72	chromosome 16 open reading frame 72
hsa-miR-561-3p	CNTN1	contactin 1
hsa-miR-561-3p	SLC12A1	solute carrier family 12 member 1
hsa-miR-561-3p	ROBO1	roundabout guidance receptor 1
hsa-miR-561-3p	RETREG1	reticulophagy regulator 1
hsa-miR-561-3p	EDIL3	EGF like repeats and discoidin domains 3
hsa-miR-561-3p	ACBD3	acyl-CoA binding domain containing 3
hsa-miR-561-3p	CCDC85A	coiled-coil domain containing 85A
hsa-miR-561-3p	SLC4A4	solute carrier family 4 member 4
hsa-miR-561-3p	PCNX1	pecanex 1
hsa-miR-561-3p	ZEB2	zinc finger E-box binding homeobox 2
hsa-miR-561-3p	TMEM181	transmembrane protein 181
hsa-miR-561-3p	TJP1	tight junction protein 1
hsa-miR-561-3p	APC	APC, WNT signaling pathway regulator
hsa-miR-561-3p	DAZ1	deleted in azoospermia 1
hsa-miR-561-3p	FAM135A	family with sequence similarity 135 member A
hsa-miR-561-3p	NBN	nibrin
hsa-miR-561-3p	RFX3	regulatory factor X3
hsa-miR-561-3p	ATF7IP	activating transcription factor 7 interacting protein
hsa-miR-561-3p	ATP11C	ATPase phospholipid transporting 11C
hsa-miR-561-3p	USP9X	ubiquitin specific peptidase 9 X-linked
hsa-miR-561-3p	GTF2A1	general transcription factor IIA subunit 1
hsa-miR-561-3p	NEK7	NIMA related kinase 7
hsa-miR-561-3p	CEBPB	CCAAT enhancer binding protein beta
hsa-miR-561-3p	DAZ4	deleted in azoospermia 4
hsa-miR-561-3p	ECT2L	epithelial cell transforming 2 like
hsa-miR-561-3p	IWS1	IWS1, SUPT6H interacting protein
hsa-miR-561-3p	DAZ3	deleted in azoospermia 3
hsa-miR-561-3p	KLHL14	kelch like family member 14
hsa-miR-561-3p	DAZ2	deleted in azoospermia 2
hsa-miR-561-3p	ZC3H12C	zinc finger CCCH-type containing 12C
hsa-miR-561-3p	STAU1	staufen double-stranded RNA binding protein 1
hsa-miR-561-3p	ZFHX4	zinc finger homeobox 4
hsa-miR-561-3p	SLC18A2	solute carrier family 18 member A2
hsa-miR-561-3p	LRRTM3	leucine rich repeat transmembrane neuronal 3
hsa-miR-561-3p	TXNDC12	thioredoxin domain containing 12
hsa-miR-561-3p	PRRG4	proline rich and Gla domain 4
hsa-miR-561-3p	PCNX4	pecanex 4
hsa-miR-561-3p	ZNF280D	zinc finger protein 280D
hsa-miR-561-3p	TBX3	T-box 3
hsa-miR-561-3p	GNPAT	glyceronephosphate O-acyltransferase
hsa-miR-561-3p	MAGT1	magnesium transporter 1
hsa-miR-561-3p	MTMR7	myotubularin related protein 7
hsa-miR-561-3p	PCDHB12	protocadherin beta 12
hsa-miR-561-3p	PIAS2	protein inhibitor of activated STAT 2
hsa-miR-561-3p	SOX5	SRY-box 5
hsa-miR-146a-5p	TRAF6	TNF receptor associated factor 6
hsa-miR-146a-5p	IRAK1	interleukin 1 receptor associated kinase 1
hsa-miR-146a-5p	SEC23IP	SEC23 interacting protein
hsa-miR-146a-5p	NOVA1	NOVA alternative splicing regulator 1
hsa-miR-146a-5p	WWC2	WW and C2 domain containing 2
hsa-miR-146a-5p	UPP2	uridine phosphorylase 2
hsa-miR-146a-5p	PPP1R11	protein phosphatase 1 regulatory inhibitor subunit 11
hsa-miR-146a-5p	BCORL1	BCL6 corepressor like 1
hsa-miR-146a-5p	SORT1	sortilin 1
hsa-miR-146a-5p	ZNF649	zinc finger protein 649
hsa-miR-146a-5p	PLSCR4	phospholipid scramblase 4
hsa-miR-146a-5p	NUMB	NUMB, endocytic adaptor protein
hsa-miR-146a-5p	USP32	ubiquitin specific peptidase 32
hsa-miR-146a-5p	APPL1	adaptor protein, phosphotyrosine interacting with PH domain and leucine zipper 1
hsa-miR-146a-5p	ZNF652	zinc finger protein 652
hsa-miR-146a-5p	SIAH2	siah E3 ubiquitin protein ligase 2
hsa-miR-146a-5p	SRSF6	serine and arginine rich splicing factor 6
hsa-miR-146a-5p	CARD10	caspase recruitment domain family member 10
hsa-miR-146a-5p	GDAP1L1	ganglioside induced differentiation associated protein 1 like 1
hsa-miR-146a-5p	EIF4G2	eukaryotic translation initiation factor 4 gamma 2
hsa-miR-146a-5p	GRIA3	glutamate ionotropic receptor AMPA type subunit 3
hsa-miR-146a-5p	MRS2	magnesium transporter MRS2
hsa-miR-146a-5p	ZNF354B	zinc finger protein 354B
hsa-miR-146a-5p	SLC10A3	solute carrier family 10 member 3
hsa-miR-146a-5p	ZNF540	zinc finger protein 540
hsa-miR-146a-5p	C9orf72	chromosome 9 open reading frame 72
hsa-miR-146a-5p	TDRKH	tudor and KH domain containing
hsa-miR-146a-5p	DDHD1	DDHD domain containing 1
hsa-miR-146a-5p	BRK1	BRICK1, SCAR/WAVE actin nucleating complex subunit
hsa-miR-146a-5p	LOC388813	uncharacterized protein ENSP00000383407-like
hsa-miR-146a-5p	POFUT2	protein O-fucosyltransferase 2
hsa-miR-146a-5p	NEMP1	nuclear envelope integral membrane protein 1
hsa-miR-146a-5p	DCAF12	DDB1 and CUL4 associated factor 12
hsa-miR-146a-5p	ZBTB2	zinc finger and BTB domain containing 2
hsa-miR-146a-5p	CD80	CD80 molecule
hsa-miR-146a-5p	CXXC4	CXXC finger protein 4
hsa-miR-146a-5p	FBXW2	F-box and WD repeat domain containing 2
hsa-miR-146a-5p	USP6	ubiquitin specific peptidase 6
hsa-miR-146a-5p	ABL2	ABL proto-oncogene 2, non-receptor tyrosine kinase
hsa-miR-146a-5p	HNRNPD	heterogeneous nuclear ribonucleoprotein D
hsa-miR-146a-5p	KCNJ16	potassium voltage-gated channel subfamily J member 16
hsa-miR-146a-5p	MMP16	matrix metallopeptidase 16
hsa-miR-146a-5p	FOXR2	forkhead box R2
hsa-miR-146a-5p	CTAGE4	CTAGE family member 4
hsa-miR-146a-5p	HIPK3	homeodomain interacting protein kinase 3
hsa-miR-146a-5p	CTAGE9	CTAGE family member 9
hsa-miR-146a-5p	RHOBTB3	Rho related BTB domain containing 3
hsa-miR-146a-5p	RARB	retinoic acid receptor beta
hsa-miR-146a-5p	CTAGE8	CTAGE family member 8
hsa-miR-146a-5p	VASN	vasorin
hsa-miR-12135	PLAGL1	PLAG1 like zinc finger 1
hsa-miR-12135	MBTD1	mbt domain containing 1
hsa-miR-12135	RCN2	reticulocalbin 2
hsa-miR-12135	MTMR7	myotubularin related protein 7
hsa-miR-12135	RORA	RAR related orphan receptor A
hsa-miR-12135	RHOBTB3	Rho related BTB domain containing 3
hsa-miR-12135	INTS6	integrator complex subunit 6
hsa-miR-12135	CAMK1D	calcium/calmodulin dependent protein kinase ID
hsa-miR-12135	CHL1	cell adhesion molecule L1 like
hsa-miR-12135	KRTAP13-1	keratin associated protein 13-1
hsa-miR-12135	KLF12	Kruppel like factor 12
hsa-miR-12135	PAX5	paired box 5
hsa-miR-12135	CLTC	clathrin heavy chain
hsa-miR-12135	WAC	WW domain containing adaptor with coiled-coil
hsa-miR-12135	SP4	Sp4 transcription factor
hsa-miR-12135	CDKN2AIP	CDKN2A interacting protein
hsa-miR-12135	GPRC5B	G protein-coupled receptor class C group 5 member B
hsa-miR-12135	PPP1R8	protein phosphatase 1 regulatory subunit 8
hsa-miR-12135	ZNF214	zinc finger protein 214
hsa-miR-12135	C1orf52	chromosome 1 open reading frame 52
hsa-miR-12135	2020-09-02	septin 2
hsa-miR-12135	NUDT4	nudix hydrolase 4
hsa-miR-12135	CAMK2G	calcium/calmodulin dependent protein kinase II gamma
hsa-miR-12135	DICER1	dicer 1, ribonuclease III
hsa-miR-12135	STAM2	signal transducing adaptor molecule 2
hsa-miR-12135	EVI2A	ecotropic viral integration site 2A
hsa-miR-12135	TADA1	transcriptional adaptor 1
hsa-miR-12135	ESYT2	extended synaptotagmin 2
hsa-miR-12135	TMEM65	transmembrane protein 65
hsa-miR-12135	ZNF135	zinc finger protein 135
hsa-miR-12135	CWF19L1	CWF19 like cell cycle control factor 1
hsa-miR-12135	PREX2	phosphatidylinositol-3,4,5-trisphosphate dependent Rac exchange factor 2
hsa-miR-12135	ZMYND11	zinc finger MYND-type containing 11
hsa-miR-12135	MMAB	metabolism of cobalamin associated B
hsa-miR-12135	SEC63	SEC63 homolog, protein translocation regulator
hsa-miR-12135	MTMR10	myotubularin related protein 10
hsa-miR-12135	TOR1B	torsin family 1 member B
hsa-miR-12135	CXXC5	CXXC finger protein 5
hsa-miR-12135	FOXJ1	forkhead box J1
hsa-miR-12135	PDZD2	PDZ domain containing 2
hsa-miR-12135	PTPN14	protein tyrosine phosphatase, non-receptor type 14
hsa-miR-12135	ADGRF3	adhesion G protein-coupled receptor F3
hsa-miR-12135	TLN2	talin 2
hsa-miR-12135	GABRG2	gamma-aminobutyric acid type A receptor gamma2 subunit
hsa-miR-12135	BSDC1	BSD domain containing 1
hsa-miR-12135	ZMYM1	zinc finger MYM-type containing 1
hsa-miR-12135	ZNF709	zinc finger protein 709
hsa-miR-12135	TBC1D14	TBC1 domain family member 14
hsa-miR-12135	RBM3	RNA binding motif protein 3
hsa-miR-12135	BTBD3	BTB domain containing 3
hsa-miR-210-5p	BTG2	BTG anti-proliferation factor 2
hsa-miR-210-5p	SH3BP4	SH3 domain binding protein 4
hsa-miR-210-5p	ZNF385B	zinc finger protein 385B
hsa-miR-210-5p	BICD2	BICD cargo adaptor 2
hsa-miR-210-5p	EP300	E1A binding protein p300
hsa-miR-210-5p	FAM161A	FAM161A, centrosomal protein
hsa-miR-210-5p	ANKRD13B	ankyrin repeat domain 13B
hsa-miR-210-5p	TENM2	teneurin transmembrane protein 2
hsa-miR-210-5p	KCNAB2	potassium voltage-gated channel subfamily A regulatory beta subunit 2
hsa-miR-210-5p	SHQ1	SHQ1, H/ACA ribonucleoprotein assembly factor
hsa-miR-210-5p	KIRREL1	kirre like nephrin family adhesion molecule 1
hsa-miR-210-5p	LDLRAD2	low density lipoprotein receptor class A domain containing 2
hsa-miR-210-5p	NOL4	nucleolar protein 4
hsa-miR-210-5p	MYO18A	myosin XVIIIA
hsa-miR-210-5p	ELOVL2	ELOVL fatty acid elongase 2
hsa-miR-210-5p	AKT3	AKT serine/threonine kinase 3
hsa-miR-210-5p	ABCA1	ATP binding cassette subfamily A member 1
hsa-miR-210-5p	ATXN7L3	ataxin 7 like 3
hsa-miR-210-5p	RIMS4	regulating synaptic membrane exocytosis 4
hsa-miR-210-5p	ISLR	immunoglobulin superfamily containing leucine rich repeat
hsa-miR-210-5p	ZDHHC22	zinc finger DHHC-type containing 22
hsa-miR-210-5p	LRP4	LDL receptor related protein 4
hsa-miR-210-5p	PPTC7	PTC7 protein phosphatase homolog
hsa-miR-210-5p	RIMS3	regulating synaptic membrane exocytosis 3
hsa-miR-210-5p	CDK13	cyclin dependent kinase 13
hsa-miR-210-5p	TBX4	T-box 4
hsa-miR-210-5p	ERFE	erythroferrone
hsa-miR-210-5p	FAF2	Fas associated factor family member 2
hsa-miR-210-5p	OAZ2	ornithine decarboxylase antizyme 2
hsa-miR-210-5p	DHRSX	dehydrogenase/reductase X-linked
hsa-miR-210-5p	ANKRD52	ankyrin repeat domain 52
hsa-miR-210-5p	ADRA1B	adrenoceptor alpha 1B
hsa-miR-210-5p	ZIC3	Zic family member 3
hsa-miR-210-5p	NPNT	nephronectin
hsa-miR-210-5p	ARL17A	ADP ribosylation factor like GTPase 17A
hsa-miR-210-5p	MEX3A	mex-3 RNA binding family member A
hsa-miR-210-5p	FAM89B	family with sequence similarity 89 member B
hsa-miR-210-5p	DAG1	dystroglycan 1
hsa-miR-210-5p	STX17	syntaxin 17
hsa-miR-210-5p	EDC3	enhancer of mRNA decapping 3
hsa-miR-210-5p	CAMK2A	calcium/calmodulin dependent protein kinase II alpha
hsa-miR-210-5p	C20orf202	chromosome 20 open reading frame 202
hsa-miR-210-5p	MYL10	myosin light chain 10
hsa-miR-210-5p	GPATCH3	G-patch domain containing 3
hsa-miR-210-5p	TMIE	transmembrane inner ear
hsa-miR-210-5p	TFCP2L1	transcription factor CP2 like 1
hsa-miR-210-5p	ARL16	ADP ribosylation factor like GTPase 16
hsa-miR-210-5p	RGS6	regulator of G protein signaling 6
hsa-miR-210-5p	PID1	phosphotyrosine interaction domain containing 1
hsa-miR-210-5p	USF1	upstream transcription factor 1
hsa-miR-146b-5p	TRAF6	TNF receptor associated factor 6
hsa-miR-146b-5p	SEC23IP	SEC23 interacting protein
hsa-miR-146b-5p	IRAK1	interleukin 1 receptor associated kinase 1
hsa-miR-146b-5p	NOVA1	NOVA alternative splicing regulator 1
hsa-miR-146b-5p	UPP2	uridine phosphorylase 2
hsa-miR-146b-5p	WWC2	WW and C2 domain containing 2
hsa-miR-146b-5p	PPP1R11	protein phosphatase 1 regulatory inhibitor subunit 11
hsa-miR-146b-5p	BCORL1	BCL6 corepressor like 1
hsa-miR-146b-5p	ZNF649	zinc finger protein 649
hsa-miR-146b-5p	SORT1	sortilin 1
hsa-miR-146b-5p	USP32	ubiquitin specific peptidase 32
hsa-miR-146b-5p	NUMB	NUMB, endocytic adaptor protein
hsa-miR-146b-5p	PLSCR4	phospholipid scramblase 4
hsa-miR-146b-5p	SIAH2	siah E3 ubiquitin protein ligase 2
hsa-miR-146b-5p	SRSF6	serine and arginine rich splicing factor 6
hsa-miR-146b-5p	CARD10	caspase recruitment domain family member 10
hsa-miR-146b-5p	ZNF652	zinc finger protein 652
hsa-miR-146b-5p	APPL1	adaptor protein, phosphotyrosine interacting with PH domain and leucine zipper 1
hsa-miR-146b-5p	GDAP1L1	ganglioside induced differentiation associated protein 1 like 1
hsa-miR-146b-5p	GRIA3	glutamate ionotropic receptor AMPA type subunit 3
hsa-miR-146b-5p	SLC10A3	solute carrier family 10 member 3
hsa-miR-146b-5p	ZNF354B	zinc finger protein 354B
hsa-miR-146b-5p	MRS2	magnesium transporter MRS2
hsa-miR-146b-5p	ZNF540	zinc finger protein 540
hsa-miR-146b-5p	EIF4G2	eukaryotic translation initiation factor 4 gamma 2
hsa-miR-146b-5p	C9orf72	chromosome 9 open reading frame 72
hsa-miR-146b-5p	BRK1	BRICK1, SCAR/WAVE actin nucleating complex subunit
hsa-miR-146b-5p	DDHD1	DDHD domain containing 1
hsa-miR-146b-5p	TDRKH	tudor and KH domain containing
hsa-miR-146b-5p	LOC388813	uncharacterized protein ENSP00000383407-like
hsa-miR-146b-5p	CD80	CD80 molecule
hsa-miR-146b-5p	CXXC4	CXXC finger protein 4
hsa-miR-146b-5p	FBXW2	F-box and WD repeat domain containing 2
hsa-miR-146b-5p	ZBTB2	zinc finger and BTB domain containing 2
hsa-miR-146b-5p	POFUT2	protein O-fucosyltransferase 2
hsa-miR-146b-5p	NEMP1	nuclear envelope integral membrane protein 1
hsa-miR-146b-5p	DCAF12	DDB1 and CUL4 associated factor 12
hsa-miR-146b-5p	USP6	ubiquitin specific peptidase 6
hsa-miR-146b-5p	KCNJ16	potassium voltage-gated channel subfamily J member 16
hsa-miR-146b-5p	ABL2	ABL proto-oncogene 2, non-receptor tyrosine kinase
hsa-miR-146b-5p	MMP16	matrix metallopeptidase 16
hsa-miR-146b-5p	HNRNPD	heterogeneous nuclear ribonucleoprotein D
hsa-miR-146b-5p	FOXR2	forkhead box R2
hsa-miR-146b-5p	CTAGE4	CTAGE family member 4
hsa-miR-146b-5p	RARB	retinoic acid receptor beta
hsa-miR-146b-5p	HIPK3	homeodomain interacting protein kinase 3
hsa-miR-146b-5p	CTAGE8	CTAGE family member 8
hsa-miR-146b-5p	RHOBTB3	Rho related BTB domain containing 3
hsa-miR-146b-5p	CTAGE9	CTAGE family member 9
hsa-miR-146b-5p	SRP72	signal recognition particle 72
hsa-miR-4446-3p	DR1	down-regulator of transcription 1
hsa-miR-4446-3p	CBX7	chromobox 7
hsa-miR-4446-3p	MBNL2	muscleblind like splicing regulator 2
hsa-miR-4446-3p	PHF24	PHD finger protein 24
hsa-miR-4446-3p	CDK18	cyclin dependent kinase 18
hsa-miR-4446-3p	C1orf162	chromosome 1 open reading frame 162
hsa-miR-4446-3p	BRCA1	BRCA1, DNA repair associated
hsa-miR-4446-3p	ZNF99	zinc finger protein 99
hsa-miR-4446-3p	FAM117A	family with sequence similarity 117 member A
hsa-miR-4446-3p	ABCG4	ATP binding cassette subfamily G member 4
hsa-miR-4446-3p	KNG1	kininogen 1
hsa-miR-4446-3p	SOCS7	suppressor of cytokine signaling 7
hsa-miR-4446-3p	HAGH	hydroxyacylglutathione hydrolase
hsa-miR-4446-3p	VWDE	von Willebrand factor D and EGF domains
hsa-miR-4446-3p	PPP4R1	protein phosphatase 4 regulatory subunit 1
hsa-miR-4446-3p	PLAG1	PLAG1 zinc finger
hsa-miR-4446-3p	IQSEC2	IQ motif and Sec7 domain 2
hsa-miR-4446-3p	RAPGEFL1	Rap guanine nucleotide exchange factor like 1
hsa-miR-4446-3p	ARID3B	AT-rich interaction domain 3B
hsa-miR-4446-3p	PDAP1	PDGFA associated protein 1
hsa-miR-4446-3p	HECW2	HECT, C2 and WW domain containing E3 ubiquitin protein ligase 2
hsa-miR-4446-3p	CTDSPL	CTD small phosphatase like
hsa-miR-4446-3p	NXT1	nuclear transport factor 2 like export factor 1
hsa-miR-4446-3p	ZBTB39	zinc finger and BTB domain containing 39
hsa-miR-4446-3p	ZNF135	zinc finger protein 135
hsa-miR-4446-3p	PAK5	p21 (RAC1) activated kinase 5
hsa-miR-4446-3p	CYBRD1	cytochrome b reductase 1
hsa-miR-4446-3p	GOLGA6C	golgin A6 family member C
hsa-miR-4446-3p	SRY	sex determining region Y
hsa-miR-4446-3p	CELF3	CUGBP Elav-like family member 3
hsa-miR-4446-3p	ZNF217	zinc finger protein 217
hsa-miR-4446-3p	CADM3	cell adhesion molecule 3
hsa-miR-4446-3p	MAL2	mal, T cell differentiation protein 2 (gene/pseudogene)
hsa-miR-4446-3p	FBXO41	F-box protein 41
hsa-miR-4446-3p	FBXO11	F-box protein 11
hsa-miR-4446-3p	TYR	tyrosinase
hsa-miR-4446-3p	IVD	isovaleryl-CoA dehydrogenase
hsa-miR-4446-3p	ZFAND5	zinc finger AN1-type containing 5
hsa-miR-4446-3p	BCL2L13	BCL2 like 13
hsa-miR-4446-3p	SSR1	signal sequence receptor subunit 1
hsa-miR-4446-3p	ZSWIM3	zinc finger SWIM-type containing 3
hsa-miR-4446-3p	FXYD6	FXYD domain containing ion transport regulator 6
hsa-miR-4446-3p	C2orf68	chromosome 2 open reading frame 68
hsa-miR-4446-3p	MSI1	musashi RNA binding protein 1
hsa-miR-4446-3p	USH2A	usherin
hsa-miR-4446-3p	FUS	FUS RNA binding protein
hsa-miR-4446-3p	FAM13A	family with sequence similarity 13 member A
hsa-miR-4446-3p	CD79A	CD79a molecule
hsa-miR-4446-3p	ANKEF1	ankyrin repeat and EF-hand domain containing 1
hsa-miR-4446-3p	GNG10	G protein subunit gamma 10
hsa-miR-877-5p	FGB	fibrinogen beta chain
hsa-miR-877-5p	FOXD4L5	forkhead box D4 like 5
hsa-miR-877-5p	C5orf47	chromosome 5 open reading frame 47
hsa-miR-877-5p	C15orf40	chromosome 15 open reading frame 40
hsa-miR-877-5p	COL6A3	collagen type VI alpha 3 chain
hsa-miR-877-5p	CEP350	centrosomal protein 350
hsa-miR-877-5p	ATE1	arginyltransferase 1
hsa-miR-877-5p	TTC14	tetratricopeptide repeat domain 14
hsa-miR-877-5p	DEPDC4	DEP domain containing 4
hsa-miR-877-5p	DDO	D-aspartate oxidase
hsa-miR-877-5p	FXR2	FMR1 autosomal homolog 2
hsa-miR-877-5p	ITM2B	integral membrane protein 2B
hsa-miR-877-5p	CSNK1G3	casein kinase 1 gamma 3
hsa-miR-877-5p	ATP11B	ATPase phospholipid transporting 11B (putative)
hsa-miR-877-5p	KRTAP4-11	keratin associated protein 4-11
hsa-miR-877-5p	SORBS3	sorbin and SH3 domain containing 3
hsa-miR-877-5p	LMBRD1	LMBR1 domain containing 1
hsa-miR-877-5p	MAP7D3	MAP7 domain containing 3
hsa-miR-877-5p	KRTAP4-8	keratin associated protein 4-8
hsa-miR-877-5p	ETFRF1	electron transfer flavoprotein regulatory factor 1
hsa-miR-877-5p	C4orf33	chromosome 4 open reading frame 33
hsa-miR-877-5p	ANO6	anoctamin 6
hsa-miR-877-5p	ZNF174	zinc finger protein 174
hsa-miR-877-5p	KRTAP4-9	keratin associated protein 4-9
hsa-miR-877-5p	VGLL3	vestigial like family member 3
hsa-miR-877-5p	ESRP1	epithelial splicing regulatory protein 1
hsa-miR-877-5p	ZFYVE26	zinc finger FYVE-type containing 26
hsa-miR-877-5p	BTD	biotinidase
hsa-miR-877-5p	GLDC	glycine decarboxylase
hsa-miR-877-5p	BAZ1A	bromodomain adjacent to zinc finger domain 1A
hsa-miR-877-5p	GRK2	G protein-coupled receptor kinase 2
hsa-miR-877-5p	CDO1	cysteine dioxygenase type 1
hsa-miR-877-5p	CFHR5	complement factor H related 5
hsa-miR-877-5p	TDRD1	tudor domain containing 1
hsa-miR-877-5p	ZNF264	zinc finger protein 264
hsa-miR-877-5p	ASTN2	astrotactin 2
hsa-miR-877-5p	E2F5	E2F transcription factor 5
hsa-miR-877-5p	EPDR1	ependymin related 1
hsa-miR-877-5p	ATP2B1	ATPase plasma membrane Ca2+ transporting 1
hsa-miR-877-5p	ELF1	E74 like ETS transcription factor 1
hsa-miR-877-5p	PANK3	pantothenate kinase 3
hsa-miR-877-5p	BTN1A1	butyrophilin subfamily 1 member A1
hsa-miR-877-5p	STYK1	serine/threonine/tyrosine kinase 1
hsa-miR-877-5p	GALR1	galanin receptor 1
hsa-miR-877-5p	ANKFY1	ankyrin repeat and FYVE domain containing 1
hsa-miR-877-5p	LMAN1	lectin, mannose binding 1
hsa-miR-877-5p	YLPM1	YLP motif containing 1
hsa-miR-877-5p	UBN2	ubinuclein 2
hsa-miR-877-5p	GFOD2	glucose-fructose oxidoreductase domain containing 2
hsa-miR-877-5p	ZC3H12B	zinc finger CCCH-type containing 12B
hsa-miR-1271-5p	ADCY6	adenylate cyclase 6
hsa-miR-1271-5p	LRCH2	leucine rich repeats and calponin homology domain containing 2
hsa-miR-1271-5p	NEXMIF	neurite extension and migration factor
hsa-miR-1271-5p	PRTG	protogenin
hsa-miR-1271-5p	SPIN1	spindlin 1
hsa-miR-1271-5p	PLPPR4	phospholipid phosphatase related 4
hsa-miR-1271-5p	FRS2	fibroblast growth factor receptor substrate 2
hsa-miR-1271-5p	HAS2	hyaluronan synthase 2
hsa-miR-1271-5p	SH3BP5	SH3 domain binding protein 5
hsa-miR-1271-5p	ATXN1	ataxin 1
hsa-miR-1271-5p	OXSR1	oxidative stress responsive kinase 1
hsa-miR-1271-5p	SLC1A1	solute carrier family 1 member 1
hsa-miR-1271-5p	UBE2G1	ubiquitin conjugating enzyme E2 G1
hsa-miR-1271-5p	BRPF3	bromodomain and PHD finger containing 3
hsa-miR-1271-5p	ITPR1	inositol 1,4,5-trisphosphate receptor type 1
hsa-miR-1271-5p	HOOK3	hook microtubule tethering protein 3
hsa-miR-1271-5p	KLHL34	kelch like family member 34
hsa-miR-1271-5p	PHIP	pleckstrin homology domain interacting protein
hsa-miR-1271-5p	MTSS1	MTSS1, I-BAR domain containing
hsa-miR-1271-5p	E2F5	E2F transcription factor 5
hsa-miR-1271-5p	MED1	mediator complex subunit 1
hsa-miR-1271-5p	JMJD1C	jumonji domain containing 1C
hsa-miR-1271-5p	SNX30	sorting nexin family member 30
hsa-miR-1271-5p	PHF20L1	PHD finger protein 20 like 1
hsa-miR-1271-5p	TBR1	T-box, brain 1
hsa-miR-1271-5p	CTTN	cortactin
hsa-miR-1271-5p	COL25A1	collagen type XXV alpha 1 chain
hsa-miR-1271-5p	SOX6	SRY-box 6
hsa-miR-1271-5p	B4GALNT1	beta-1,4-N-acetyl-galactosaminyltransferase 1
hsa-miR-1271-5p	VAMP3	vesicle associated membrane protein 3
hsa-miR-1271-5p	ZEB1	zinc finger E-box binding homeobox 1
hsa-miR-1271-5p	MTOR	mechanistic target of rapamycin kinase
hsa-miR-1271-5p	ZFP36L1	ZFP36 ring finger protein like 1
hsa-miR-1271-5p	SIN3B	SIN3 transcription regulator family member B
hsa-miR-1271-5p	CHST1	carbohydrate sulfotransferase 1
hsa-miR-1271-5p	SESN3	sestrin 3
hsa-miR-1271-5p	SLAIN2	SLAIN motif family member 2
hsa-miR-1271-5p	RAB8B	RAB8B, member RAS oncogene family
hsa-miR-1271-5p	TTYH3	tweety family member 3
hsa-miR-1271-5p	ZCCHC3	zinc finger CCHC-type containing 3
hsa-miR-1271-5p	PALLD	palladin, cytoskeletal associated protein
hsa-miR-1271-5p	ARHGAP6	Rho GTPase activating protein 6
hsa-miR-1271-5p	FOXF2	forkhead box F2
hsa-miR-1271-5p	ATXN3	ataxin 3
hsa-miR-1271-5p	ZBTB41	zinc finger and BTB domain containing 41
hsa-miR-1271-5p	FRMD5	FERM domain containing 5
hsa-miR-1271-5p	ANKRD27	ankyrin repeat domain 27
hsa-miR-1271-5p	PRKCE	protein kinase C epsilon
hsa-miR-1271-5p	SH3KBP1	SH3 domain containing kinase binding protein 1
hsa-miR-1271-5p	PPP4R3A	protein phosphatase 4 regulatory subunit 3A
Best scored target genes of the 42 DEMs from T. gondii vs. Control HPE
miRNA Name	Gene Symbol	Gene Description
hsa-miR-12136	IGSF11	immunoglobulin superfamily member 11
hsa-miR-12136	DAAM1	dishevelled associated activator of morphogenesis 1
hsa-miR-12136	STXBP5	syntaxin binding protein 5
hsa-miR-12136	KDSR	3-ketodihydrosphingosine reductase
hsa-miR-12136	NEDD4L	neural precursor cell expressed, developmentally down-regulated 4-like, E3 ubiquitin protein ligase
hsa-miR-12136	BCL10	BCL10, immune signaling adaptor
hsa-miR-12136	MAST3	microtubule associated serine/threonine kinase 3
hsa-miR-12136	PTBP3	polypyrimidine tract binding protein 3
hsa-miR-12136	LHX9	LIM homeobox 9
hsa-miR-12136	SCAI	suppressor of cancer cell invasion
hsa-miR-12136	CREB1	cAMP responsive element binding protein 1
hsa-miR-12136	ARPP19	cAMP regulated phosphoprotein 19
hsa-miR-12136	TRIO	trio Rho guanine nucleotide exchange factor
hsa-miR-12136	MMD	monocyte to macrophage differentiation associated
hsa-miR-12136	ZHX1	zinc fingers and homeoboxes 1
hsa-miR-12136	ZBTB20	zinc finger and BTB domain containing 20
hsa-miR-12136	TNRC6B	trinucleotide repeat containing 6B
hsa-miR-12136	PPP2R2A	protein phosphatase 2 regulatory subunit Balpha
hsa-miR-12136	PPM1D	protein phosphatase, Mg2+/Mn2+ dependent 1D
hsa-miR-12136	TRAK2	trafficking kinesin protein 2
hsa-miR-12136	ACVR2A	activin A receptor type 2A
hsa-miR-12136	SP1	Sp1 transcription factor
hsa-miR-12136	GIT2	GIT ArfGAP 2
hsa-miR-12136	COL19A1	collagen type XIX alpha 1 chain
hsa-miR-12136	FNDC3A	fibronectin type III domain containing 3A
hsa-miR-12136	CHD1	chromodomain helicase DNA binding protein 1
hsa-miR-12136	APPBP2	amyloid beta precursor protein binding protein 2
hsa-miR-12136	PHIP	pleckstrin homology domain interacting protein
hsa-miR-12136	TUT7	terminal uridylyl transferase 7
hsa-miR-12136	HOOK1	hook microtubule tethering protein 1
hsa-miR-12136	FBXO32	F-box protein 32
hsa-miR-12136	MYO6	myosin VI
hsa-miR-12136	SEC61A2	Sec61 translocon alpha 2 subunit
hsa-miR-12136	THSD7A	thrombospondin type 1 domain containing 7A
hsa-miR-12136	TENT4B	terminal nucleotidyltransferase 4B
hsa-miR-12136	OSBPL8	oxysterol binding protein like 8
hsa-miR-12136	GTF2A2	general transcription factor IIA subunit 2
hsa-miR-12136	BRPF3	bromodomain and PHD finger containing 3
hsa-miR-12136	SMARCE1	SWI/SNF related, matrix associated, actin dependent regulator of chromatin, subfamily e, member 1
hsa-miR-12136	ABCG2	ATP binding cassette subfamily G member 2 (Junior blood group)
hsa-miR-12136	DDX3X	DEAD-box helicase 3 X-linked
hsa-miR-12136	IVNS1ABP	influenza virus NS1A binding protein
hsa-miR-12136	GUCY1A2	guanylate cyclase 1 soluble subunit alpha 2
hsa-miR-12136	AMOT	angiomotin
hsa-miR-12136	PLOD2	procollagen-lysine,2-oxoglutarate 5-dioxygenase 2
hsa-miR-12136	RC3H1	ring finger and CCCH-type domains 1
hsa-miR-12136	TM9SF3	transmembrane 9 superfamily member 3
hsa-miR-12136	PTPRG	protein tyrosine phosphatase, receptor type G
hsa-miR-12136	LCOR	ligand dependent nuclear receptor corepressor
hsa-miR-12136	SMG1	SMG1, nonsense mediated mRNA decay associated PI3K related kinase
hsa-miR-335-5p	CASP7	caspase 7
hsa-miR-335-5p	SEPHS1	selenophosphate synthetase 1
hsa-miR-335-5p	SRSF4	serine and arginine rich splicing factor 4
hsa-miR-335-5p	ZRANB1	zinc finger RANBP2-type containing 1
hsa-miR-335-5p	NRXN1	neurexin 1
hsa-miR-335-5p	FLT1	fms related tyrosine kinase 1
hsa-miR-335-5p	POU2F3	POU class 2 homeobox 3
hsa-miR-335-5p	KRT81	keratin 81
hsa-miR-335-5p	STAG1	stromal antigen 1
hsa-miR-335-5p	HOXD8	homeobox D8
hsa-miR-335-5p	DAAM1	dishevelled associated activator of morphogenesis 1
hsa-miR-335-5p	CHFR	checkpoint with forkhead and ring finger domains
hsa-miR-335-5p	TTK	TTK protein kinase
hsa-miR-335-5p	GATA2	GATA binding protein 2
hsa-miR-335-5p	NXPH2	neurexophilin 2
hsa-miR-335-5p	VAPA	VAMP associated protein A
hsa-miR-335-5p	ARGLU1	arginine and glutamate rich 1
hsa-miR-335-5p	USP24	ubiquitin specific peptidase 24
hsa-miR-335-5p	PTGES3L	prostaglandin E synthase 3 like
hsa-miR-335-5p	PSD3	pleckstrin and Sec7 domain containing 3
hsa-miR-335-5p	HAND1	heart and neural crest derivatives expressed 1
hsa-miR-335-5p	TMEM59	transmembrane protein 59
hsa-miR-335-5p	TNFSF11	TNF superfamily member 11
hsa-miR-335-5p	UBE2G1	ubiquitin conjugating enzyme E2 G1
hsa-miR-335-5p	TPST1	tyrosylprotein sulfotransferase 1
hsa-miR-335-5p	RPRM	reprimo, TP53 dependent G2 arrest mediator homolog
hsa-miR-335-5p	ATE1	arginyltransferase 1
hsa-miR-335-5p	SOX6	SRY-box 6
hsa-miR-335-5p	ALPG	alkaline phosphatase, germ cell
hsa-miR-335-5p	CNOT7	CCR4-NOT transcription complex subunit 7
hsa-miR-335-5p	PRKAA2	protein kinase AMP-activated catalytic subunit alpha 2
hsa-miR-335-5p	RTL9	retrotransposon Gag like 9
hsa-miR-335-5p	TMEM41A	transmembrane protein 41A
hsa-miR-335-5p	CALU	calumenin
hsa-miR-335-5p	M6PR	mannose-6-phosphate receptor, cation dependent
hsa-miR-335-5p	ZHX1	zinc fingers and homeoboxes 1
hsa-miR-335-5p	FBXO28	F-box protein 28
hsa-miR-335-5p	KDM2B	lysine demethylase 2B
hsa-miR-335-5p	FAM131B	family with sequence similarity 131 member B
hsa-miR-335-5p	TXNDC8	thioredoxin domain containing 8
hsa-miR-335-5p	GBP1	guanylate binding protein 1
hsa-miR-335-5p	GLYR1	glyoxylate reductase 1 homolog
hsa-miR-335-5p	PTPRB	protein tyrosine phosphatase, receptor type B
hsa-miR-335-5p	SNIP1	Smad nuclear interacting protein 1
hsa-miR-335-5p	SRF	serum response factor
hsa-miR-335-5p	SMARCA2	SWI/SNF related, matrix associated, actin dependent regulator of chromatin, subfamily a, member 2
hsa-miR-335-5p	FMN1	formin 1
hsa-miR-335-5p	EIF5A2	eukaryotic translation initiation factor 5A2
hsa-miR-335-5p	PGM3	phosphoglucomutase 3
hsa-miR-335-5p	PANK1	pantothenate kinase 1
hsa-miR-10b-5p	CADM2	cell adhesion molecule 2
hsa-miR-10b-5p	TFAP2C	transcription factor AP-2 gamma
hsa-miR-10b-5p	CNOT6	CCR4-NOT transcription complex subunit 6
hsa-miR-10b-5p	GALNT1	polypeptide N-acetylgalactosaminyltransferase 1
hsa-miR-10b-5p	RORA	RAR related orphan receptor A
hsa-miR-10b-5p	E2F7	E2F transcription factor 7
hsa-miR-10b-5p	CRLF3	cytokine receptor like factor 3
hsa-miR-10b-5p	SOBP	sine oculis binding protein homolog
hsa-miR-10b-5p	KCNA6	potassium voltage-gated channel subfamily A member 6
hsa-miR-10b-5p	ELOVL2	ELOVL fatty acid elongase 2
hsa-miR-10b-5p	NR6A1	nuclear receptor subfamily 6 group A member 1
hsa-miR-10b-5p	CDK6	cyclin dependent kinase 6
hsa-miR-10b-5p	SIX4	SIX homeobox 4
hsa-miR-10b-5p	EBF2	EBF transcription factor 2
hsa-miR-10b-5p	LCA5	LCA5, lebercilin
hsa-miR-10b-5p	BBX	BBX, HMG-box containing
hsa-miR-10b-5p	KLHL29	kelch like family member 29
hsa-miR-10b-5p	ZNF367	zinc finger protein 367
hsa-miR-10b-5p	CREB1	cAMP responsive element binding protein 1
hsa-miR-10b-5p	FIGN	fidgetin, microtubule severing factor
hsa-miR-10b-5p	MAP3K7	mitogen-activated protein kinase kinase kinase 7
hsa-miR-10b-5p	MDGA2	MAM domain containing glycosylphosphatidylinositol anchor 2
hsa-miR-10b-5p	SMAP1	small ArfGAP 1
hsa-miR-10b-5p	CEP350	centrosomal protein 350
hsa-miR-10b-5p	TIAM1	T cell lymphoma invasion and metastasis 1
hsa-miR-10b-5p	CRK	CRK proto-oncogene, adaptor protein
hsa-miR-10b-5p	TRIM2	tripartite motif containing 2
hsa-miR-10b-5p	IGDCC4	immunoglobulin superfamily DCC subclass member 4
hsa-miR-10b-5p	RB1CC1	RB1 inducible coiled-coil 1
hsa-miR-10b-5p	ARSK	arylsulfatase family member K
hsa-miR-10b-5p	BDNF	brain derived neurotrophic factor
hsa-miR-10b-5p	MAPRE1	microtubule associated protein RP/EB family member 1
hsa-miR-10b-5p	KCNA1	potassium voltage-gated channel subfamily A member 1
hsa-miR-10b-5p	HOXA3	homeobox A3
hsa-miR-10b-5p	RTN4R	reticulon 4 receptor
hsa-miR-10b-5p	LIX1L	limb and CNS expressed 1 like
hsa-miR-10b-5p	RNF112	ring finger protein 112
hsa-miR-10b-5p	LGALSL	galectin like
hsa-miR-10b-5p	NR2C2	nuclear receptor subfamily 2 group C member 2
hsa-miR-10b-5p	TFRC	transferrin receptor
hsa-miR-10b-5p	XRN1	5'-3' exoribonuclease 1
hsa-miR-10b-5p	TBX5	T-box 5
hsa-miR-10b-5p	HERC6	HECT and RLD domain containing E3 ubiquitin protein ligase family member 6
hsa-miR-10b-5p	TRMT10A	tRNA methyltransferase 10A
hsa-miR-10b-5p	CLCC1	chloride channel CLIC like 1
hsa-miR-10b-5p	BLOC1S5	biogenesis of lysosomal organelles complex 1 subunit 5
hsa-miR-10b-5p	EPHA5	EPH receptor A5
hsa-miR-10b-5p	GATA6	GATA binding protein 6
hsa-miR-10b-5p	CCNB3	cyclin B3
hsa-miR-10b-5p	BCL2L11	BCL2 like 11
hsa-miR-1271-5p	ADCY6	adenylate cyclase 6
hsa-miR-1271-5p	LRCH2	leucine rich repeats and calponin homology domain containing 2
hsa-miR-1271-5p	NEXMIF	neurite extension and migration factor
hsa-miR-1271-5p	PRTG	protogenin
hsa-miR-1271-5p	SPIN1	spindlin 1
hsa-miR-1271-5p	PLPPR4	phospholipid phosphatase related 4
hsa-miR-1271-5p	FRS2	fibroblast growth factor receptor substrate 2
hsa-miR-1271-5p	HAS2	hyaluronan synthase 2
hsa-miR-1271-5p	SH3BP5	SH3 domain binding protein 5
hsa-miR-1271-5p	ATXN1	ataxin 1
hsa-miR-1271-5p	OXSR1	oxidative stress responsive kinase 1
hsa-miR-1271-5p	SLC1A1	solute carrier family 1 member 1
hsa-miR-1271-5p	UBE2G1	ubiquitin conjugating enzyme E2 G1
hsa-miR-1271-5p	BRPF3	bromodomain and PHD finger containing 3
hsa-miR-1271-5p	ITPR1	inositol 1,4,5-trisphosphate receptor type 1
hsa-miR-1271-5p	HOOK3	hook microtubule tethering protein 3
hsa-miR-1271-5p	KLHL34	kelch like family member 34
hsa-miR-1271-5p	PHIP	pleckstrin homology domain interacting protein
hsa-miR-1271-5p	MTSS1	MTSS1, I-BAR domain containing
hsa-miR-1271-5p	E2F5	E2F transcription factor 5
hsa-miR-1271-5p	MED1	mediator complex subunit 1
hsa-miR-1271-5p	JMJD1C	jumonji domain containing 1C
hsa-miR-1271-5p	SNX30	sorting nexin family member 30
hsa-miR-1271-5p	PHF20L1	PHD finger protein 20 like 1
hsa-miR-1271-5p	TBR1	T-box, brain 1
hsa-miR-1271-5p	CTTN	cortactin
hsa-miR-1271-5p	COL25A1	collagen type XXV alpha 1 chain
hsa-miR-1271-5p	SOX6	SRY-box 6
hsa-miR-1271-5p	B4GALNT1	beta-1,4-N-acetyl-galactosaminyltransferase 1
hsa-miR-1271-5p	VAMP3	vesicle associated membrane protein 3
hsa-miR-1271-5p	ZEB1	zinc finger E-box binding homeobox 1
hsa-miR-1271-5p	MTOR	mechanistic target of rapamycin kinase
hsa-miR-1271-5p	ZFP36L1	ZFP36 ring finger protein like 1
hsa-miR-1271-5p	SIN3B	SIN3 transcription regulator family member B
hsa-miR-1271-5p	CHST1	carbohydrate sulfotransferase 1
hsa-miR-1271-5p	SESN3	sestrin 3
hsa-miR-1271-5p	SLAIN2	SLAIN motif family member 2
hsa-miR-1271-5p	RAB8B	RAB8B, member RAS oncogene family
hsa-miR-1271-5p	TTYH3	tweety family member 3
hsa-miR-1271-5p	ZCCHC3	zinc finger CCHC-type containing 3
hsa-miR-1271-5p	PALLD	palladin, cytoskeletal associated protein
hsa-miR-1271-5p	ARHGAP6	Rho GTPase activating protein 6
hsa-miR-1271-5p	FOXF2	forkhead box F2
hsa-miR-1271-5p	ATXN3	ataxin 3
hsa-miR-1271-5p	ZBTB41	zinc finger and BTB domain containing 41
hsa-miR-1271-5p	FRMD5	FERM domain containing 5
hsa-miR-1271-5p	ANKRD27	ankyrin repeat domain 27
hsa-miR-1271-5p	PRKCE	protein kinase C epsilon
hsa-miR-1271-5p	SH3KBP1	SH3 domain containing kinase binding protein 1
hsa-miR-1271-5p	PPP4R3A	protein phosphatase 4 regulatory subunit 3A
hsa-miR-409-5p	ZBTB34	zinc finger and BTB domain containing 34
hsa-miR-409-5p	USP7	ubiquitin specific peptidase 7
hsa-miR-409-5p	CREM	cAMP responsive element modulator
hsa-miR-409-5p	GNG12	G protein subunit gamma 12
hsa-miR-409-5p	ANKRD13C	ankyrin repeat domain 13C
hsa-miR-409-5p	NADK2	NAD kinase 2, mitochondrial
hsa-miR-409-5p	CPSF6	cleavage and polyadenylation specific factor 6
hsa-miR-409-5p	NETO2	neuropilin and tolloid like 2
hsa-miR-409-5p	PAX9	paired box 9
hsa-miR-409-5p	KDM4D	lysine demethylase 4D
hsa-miR-409-5p	TMC5	transmembrane channel like 5
hsa-miR-409-5p	ADAM10	ADAM metallopeptidase domain 10
hsa-miR-409-5p	CGGBP1	CGG triplet repeat binding protein 1
hsa-miR-409-5p	TRPS1	transcriptional repressor GATA binding 1
hsa-miR-409-5p	FAM126A	family with sequence similarity 126 member A
hsa-miR-409-5p	TMEM155	transmembrane protein 155
hsa-miR-409-5p	PDAP1	PDGFA associated protein 1
hsa-miR-409-5p	CBLN2	cerebellin 2 precursor
hsa-miR-409-5p	AK9	adenylate kinase 9
hsa-miR-409-5p	KDM5A	lysine demethylase 5A
hsa-miR-409-5p	HMBS	hydroxymethylbilane synthase
hsa-miR-409-5p	LRTM2	leucine rich repeats and transmembrane domains 2
hsa-miR-409-5p	MARCKS	myristoylated alanine rich protein kinase C substrate
hsa-miR-409-5p	ASPH	aspartate beta-hydroxylase
hsa-miR-409-5p	CAMTA1	calmodulin binding transcription activator 1
hsa-miR-409-5p	NAIP	NLR family apoptosis inhibitory protein
hsa-miR-409-5p	GPAT3	glycerol-3-phosphate acyltransferase 3
hsa-miR-409-5p	MAPK1IP1L	mitogen-activated protein kinase 1 interacting protein 1 like
hsa-miR-409-5p	RUFY2	RUN and FYVE domain containing 2
hsa-miR-409-5p	PCLO	piccolo presynaptic cytomatrix protein
hsa-miR-409-5p	SEMG1	semenogelin 1
hsa-miR-409-5p	LRRC57	leucine rich repeat containing 57
hsa-miR-409-5p	USP53	ubiquitin specific peptidase 53
hsa-miR-409-5p	ACVR2B	activin A receptor type 2B
hsa-miR-409-5p	MKRN1	makorin ring finger protein 1
hsa-miR-409-5p	ACAT1	acetyl-CoA acetyltransferase 1
hsa-miR-409-5p	LRP8	LDL receptor related protein 8
hsa-miR-409-5p	FGFR1OP	FGFR1 oncogene partner
hsa-miR-409-5p	MINDY2	MINDY lysine 48 deubiquitinase 2
hsa-miR-409-5p	PARP3	poly(ADP-ribose) polymerase family member 3
hsa-miR-409-5p	PAOX	polyamine oxidase
hsa-miR-409-5p	CCDC121	coiled-coil domain containing 121
hsa-miR-409-5p	SAMD4B	sterile alpha motif domain containing 4B
hsa-miR-409-5p	PEG10	paternally expressed 10
hsa-miR-409-5p	LRRTM3	leucine rich repeat transmembrane neuronal 3
hsa-miR-409-5p	SERF2	small EDRK-rich factor 2
hsa-miR-409-5p	STRIP2	striatin interacting protein 2
hsa-miR-409-5p	SLC44A1	solute carrier family 44 member 1
hsa-miR-409-5p	SAMD4A	sterile alpha motif domain containing 4A
hsa-miR-409-5p	ZDHHC9	zinc finger DHHC-type containing 9
hsa-miR-27a-3p	AFF4	AF4/FMR2 family member 4
hsa-miR-27a-3p	GXYLT1	glucoside xylosyltransferase 1
hsa-miR-27a-3p	ARFGEF1	ADP ribosylation factor guanine nucleotide exchange factor 1
hsa-miR-27a-3p	GCC2	GRIP and coiled-coil domain containing 2
hsa-miR-27a-3p	DCUN1D4	defective in cullin neddylation 1 domain containing 4
hsa-miR-27a-3p	PLK2	polo like kinase 2
hsa-miR-27a-3p	TNPO1	transportin 1
hsa-miR-27a-3p	TRPV3	transient receptor potential cation channel subfamily V member 3
hsa-miR-27a-3p	GAB1	GRB2 associated binding protein 1
hsa-miR-27a-3p	GRIA4	glutamate ionotropic receptor AMPA type subunit 4
hsa-miR-27a-3p	BEX3	brain expressed X-linked 3
hsa-miR-27a-3p	MBTD1	mbt domain containing 1
hsa-miR-27a-3p	PDS5B	PDS5 cohesin associated factor B
hsa-miR-27a-3p	AKIRIN1	akirin 1
hsa-miR-27a-3p	RPS6KA5	ribosomal protein S6 kinase A5
hsa-miR-27a-3p	RGPD6	RANBP2-like and GRIP domain containing 6
hsa-miR-27a-3p	PHLPP2	PH domain and leucine rich repeat protein phosphatase 2
hsa-miR-27a-3p	TAB3	TGF-beta activated kinase 1 (MAP3K7) binding protein 3
hsa-miR-27a-3p	SOS1	SOS Ras/Rac guanine nucleotide exchange factor 1
hsa-miR-27a-3p	FBXW7	F-box and WD repeat domain containing 7
hsa-miR-27a-3p	CDS1	CDP-diacylglycerol synthase 1
hsa-miR-27a-3p	RGPD5	RANBP2-like and GRIP domain containing 5
hsa-miR-27a-3p	SEMA6A	semaphorin 6A
hsa-miR-27a-3p	NRK	Nik related kinase
hsa-miR-27a-3p	USP42	ubiquitin specific peptidase 42
hsa-miR-27a-3p	ABHD17C	abhydrolase domain containing 17C
hsa-miR-27a-3p	GPAM	glycerol-3-phosphate acyltransferase, mitochondrial
hsa-miR-27a-3p	ARHGEF26	Rho guanine nucleotide exchange factor 26
hsa-miR-27a-3p	RGPD4	RANBP2-like and GRIP domain containing 4
hsa-miR-27a-3p	KCNK2	potassium two pore domain channel subfamily K member 2
hsa-miR-27a-3p	EYA1	EYA transcriptional coactivator and phosphatase 1
hsa-miR-27a-3p	RGPD8	RANBP2-like and GRIP domain containing 8
hsa-miR-27a-3p	ZBTB34	zinc finger and BTB domain containing 34
hsa-miR-27a-3p	KIAA1109	KIAA1109
hsa-miR-27a-3p	ST6GALNAC3	ST6 N-acetylgalactosaminide alpha-2,6-sialyltransferase 3
hsa-miR-27a-3p	EYA4	EYA transcriptional coactivator and phosphatase 4
hsa-miR-27a-3p	PLEKHJ1	pleckstrin homology domain containing J1
hsa-miR-27a-3p	SBF2	SET binding factor 2
hsa-miR-27a-3p	PRR3	proline rich 3
hsa-miR-27a-3p	ONECUT2	one cut homeobox 2
hsa-miR-27a-3p	TMBIM6	transmembrane BAX inhibitor motif containing 6
hsa-miR-27a-3p	FOXA3	forkhead box A3
hsa-miR-27a-3p	BTG2	BTG anti-proliferation factor 2
hsa-miR-27a-3p	ADAMTSL3	ADAMTS like 3
hsa-miR-27a-3p	RUNX1	runt related transcription factor 1
hsa-miR-27a-3p	ACVR1C	activin A receptor type 1C
hsa-miR-27a-3p	TMEM170B	transmembrane protein 170B
hsa-miR-27a-3p	TMCC1	transmembrane and coiled-coil domain family 1
hsa-miR-27a-3p	EHF	ETS homologous factor
hsa-miR-27a-3p	GRIN2D	glutamate ionotropic receptor NMDA type subunit 2D
hsa-miR-29a-3p	COL5A3	collagen type V alpha 3 chain
hsa-miR-29a-3p	COL5A1	collagen type V alpha 1 chain
hsa-miR-29a-3p	TET1	tet methylcytosine dioxygenase 1
hsa-miR-29a-3p	HBP1	HMG-box transcription factor 1
hsa-miR-29a-3p	FBN1	fibrillin 1
hsa-miR-29a-3p	ATAD2B	ATPase family, AAA domain containing 2B
hsa-miR-29a-3p	TET3	tet methylcytosine dioxygenase 3
hsa-miR-29a-3p	COL3A1	collagen type III alpha 1 chain
hsa-miR-29a-3p	DOT1L	DOT1 like histone lysine methyltransferase
hsa-miR-29a-3p	COL11A1	collagen type XI alpha 1 chain
hsa-miR-29a-3p	DNMT3A	DNA methyltransferase 3 alpha
hsa-miR-29a-3p	PI15	peptidase inhibitor 15
hsa-miR-29a-3p	BRWD3	bromodomain and WD repeat domain containing 3
hsa-miR-29a-3p	HAS3	hyaluronan synthase 3
hsa-miR-29a-3p	NEXMIF	neurite extension and migration factor
hsa-miR-29a-3p	NSD1	nuclear receptor binding SET domain protein 1
hsa-miR-29a-3p	KMT5C	lysine methyltransferase 5C
hsa-miR-29a-3p	NAV3	neuron navigator 3
hsa-miR-29a-3p	NAV1	neuron navigator 1
hsa-miR-29a-3p	ADAMTS9	ADAM metallopeptidase with thrombospondin type 1 motif 9
hsa-miR-29a-3p	SESTD1	SEC14 and spectrin domain containing 1
hsa-miR-29a-3p	TMEM169	transmembrane protein 169
hsa-miR-29a-3p	COL19A1	collagen type XIX alpha 1 chain
hsa-miR-29a-3p	ADAMTS6	ADAM metallopeptidase with thrombospondin type 1 motif 6
hsa-miR-29a-3p	SMS	spermine synthase
hsa-miR-29a-3p	NAV2	neuron navigator 2
hsa-miR-29a-3p	ERCC6	ERCC excision repair 6, chromatin remodeling factor
hsa-miR-29a-3p	IGF1	insulin like growth factor 1
hsa-miR-29a-3p	ZBTB34	zinc finger and BTB domain containing 34
hsa-miR-29a-3p	COL4A1	collagen type IV alpha 1 chain
hsa-miR-29a-3p	C1QTNF6	C1q and TNF related 6
hsa-miR-29a-3p	AKT3	AKT serine/threonine kinase 3
hsa-miR-29a-3p	NFIA	nuclear factor I A
hsa-miR-29a-3p	COL1A1	collagen type I alpha 1 chain
hsa-miR-29a-3p	TRIB2	tribbles pseudokinase 2
hsa-miR-29a-3p	NASP	nuclear autoantigenic sperm protein
hsa-miR-29a-3p	COL7A1	collagen type VII alpha 1 chain
hsa-miR-29a-3p	KDM5B	lysine demethylase 5B
hsa-miR-29a-3p	C16orf72	chromosome 16 open reading frame 72
hsa-miR-29a-3p	DAAM2	dishevelled associated activator of morphogenesis 2
hsa-miR-29a-3p	DIO2	iodothyronine deiodinase 2
hsa-miR-29a-3p	TET2	tet methylcytosine dioxygenase 2
hsa-miR-29a-3p	XKR6	XK related 6
hsa-miR-29a-3p	SPARC	secreted protein acidic and cysteine rich
hsa-miR-29a-3p	PURG	purine rich element binding protein G
hsa-miR-29a-3p	PTEN	phosphatase and tensin homolog
hsa-miR-29a-3p	ADAMTS17	ADAM metallopeptidase with thrombospondin type 1 motif 17
hsa-miR-29a-3p	HIF3A	hypoxia inducible factor 3 subunit alpha
hsa-miR-29a-3p	COL5A2	collagen type V alpha 2 chain
hsa-miR-29a-3p	COL2A1	collagen type II alpha 1 chain
hsa-miR-214-3p	LSM12	LSM12 homolog
hsa-miR-214-3p	RC3H1	ring finger and CCCH-type domains 1
hsa-miR-214-3p	NAA15	N(alpha)-acetyltransferase 15, NatA auxiliary subunit
hsa-miR-214-3p	AMMECR1L	AMMECR1 like
hsa-miR-214-3p	ZFAND3	zinc finger AN1-type containing 3
hsa-miR-214-3p	NEO1	neogenin 1
hsa-miR-214-3p	DOLPP1	dolichyldiphosphatase 1
hsa-miR-214-3p	GSK3B	glycogen synthase kinase 3 beta
hsa-miR-214-3p	MED19	mediator complex subunit 19
hsa-miR-214-3p	DMXL2	Dmx like 2
hsa-miR-214-3p	MFN2	mitofusin 2
hsa-miR-214-3p	SEC24C	SEC24 homolog C, COPII coat complex component
hsa-miR-214-3p	C17orf49	chromosome 17 open reading frame 49
hsa-miR-214-3p	MAPK1	mitogen-activated protein kinase 1
hsa-miR-214-3p	PGF	placental growth factor
hsa-miR-214-3p	ATP2A3	ATPase sarcoplasmic/endoplasmic reticulum Ca2+ transporting 3
hsa-miR-214-3p	SNX12	sorting nexin 12
hsa-miR-214-3p	VPS53	VPS53, GARP complex subunit
hsa-miR-214-3p	PIM1	Pim-1 proto-oncogene, serine/threonine kinase
hsa-miR-214-3p	CBL	Cbl proto-oncogene
hsa-miR-214-3p	JPH1	junctophilin 1
hsa-miR-214-3p	AKAP13	A-kinase anchoring protein 13
hsa-miR-214-3p	HPSE2	heparanase 2 (inactive)
hsa-miR-214-3p	BAZ2A	bromodomain adjacent to zinc finger domain 2A
hsa-miR-214-3p	MLLT10	MLLT10, histone lysine methyltransferase DOT1L cofactor
hsa-miR-214-3p	TRA2B	transformer 2 beta homolog
hsa-miR-214-3p	RUBCN	rubicon autophagy regulator
hsa-miR-214-3p	RBM34	RNA binding motif protein 34
hsa-miR-214-3p	HR	HR, lysine demethylase and nuclear receptor corepressor
hsa-miR-214-3p	FBXO32	F-box protein 32
hsa-miR-214-3p	SLC8A1	solute carrier family 8 member A1
hsa-miR-214-3p	IRS1	insulin receptor substrate 1
hsa-miR-214-3p	CTSS	cathepsin S
hsa-miR-214-3p	PLAGL2	PLAG1 like zinc finger 2
hsa-miR-214-3p	FGF14	fibroblast growth factor 14
hsa-miR-214-3p	EXOC3L2	exocyst complex component 3 like 2
hsa-miR-214-3p	TBL1XR1	transducin beta like 1 X-linked receptor 1
hsa-miR-214-3p	COP1	COP1, E3 ubiquitin ligase
hsa-miR-214-3p	PYM1	PYM homolog 1, exon junction complex associated factor
hsa-miR-214-3p	PRR14L	proline rich 14 like
hsa-miR-214-3p	IPO7	importin 7
hsa-miR-214-3p	QKI	QKI, KH domain containing RNA binding
hsa-miR-214-3p	DLL1	delta like canonical Notch ligand 1
hsa-miR-214-3p	ZBTB20	zinc finger and BTB domain containing 20
hsa-miR-214-3p	CPSF4	cleavage and polyadenylation specific factor 4
hsa-miR-214-3p	PROX1	prospero homeobox 1
hsa-miR-214-3p	MLXIP	MLX interacting protein
hsa-miR-214-3p	TNPO1	transportin 1
hsa-miR-214-3p	BTBD1	BTB domain containing 1
hsa-miR-214-3p	RPUSD1	RNA pseudouridine synthase domain containing 1
hsa-miR-379-5p	TXLNG	taxilin gamma
hsa-miR-379-5p	MTMR2	myotubularin related protein 2
hsa-miR-379-5p	EIF4G2	eukaryotic translation initiation factor 4 gamma 2
hsa-miR-379-5p	ELMOD2	ELMO domain containing 2
hsa-miR-379-5p	MCTP2	multiple C2 and transmembrane domain containing 2
hsa-miR-379-5p	SEMA3A	semaphorin 3A
hsa-miR-379-5p	FZD4	frizzled class receptor 4
hsa-miR-379-5p	LZTS3	leucine zipper tumor suppressor family member 3
hsa-miR-379-5p	OGN	osteoglycin
hsa-miR-379-5p	RAB30	RAB30, member RAS oncogene family
hsa-miR-379-5p	PITPNM3	PITPNM family member 3
hsa-miR-379-5p	SMAP1	small ArfGAP 1
hsa-miR-379-5p	SDE2	SDE2 telomere maintenance homolog
hsa-miR-379-5p	ZBTB26	zinc finger and BTB domain containing 26
hsa-miR-379-5p	NRARP	NOTCH regulated ankyrin repeat protein
hsa-miR-379-5p	GALNT15	polypeptide N-acetylgalactosaminyltransferase 15
hsa-miR-379-5p	ESRP1	epithelial splicing regulatory protein 1
hsa-miR-379-5p	ZCCHC2	zinc finger CCHC-type containing 2
hsa-miR-379-5p	DNAJC30	DnaJ heat shock protein family (Hsp40) member C30
hsa-miR-379-5p	UBE2E3	ubiquitin conjugating enzyme E2 E3
hsa-miR-379-5p	MDM2	MDM2 proto-oncogene
hsa-miR-379-5p	LINGO2	leucine rich repeat and Ig domain containing 2
hsa-miR-379-5p	NHLRC3	NHL repeat containing 3
hsa-miR-379-5p	GDF6	growth differentiation factor 6
hsa-miR-379-5p	TLCD2	TLC domain containing 2
hsa-miR-379-5p	NR6A1	nuclear receptor subfamily 6 group A member 1
hsa-miR-379-5p	MTO1	mitochondrial tRNA translation optimization 1
hsa-miR-379-5p	CXCL11	C-X-C motif chemokine ligand 11
hsa-miR-379-5p	PPP4R1	protein phosphatase 4 regulatory subunit 1
hsa-miR-379-5p	RAD18	RAD18, E3 ubiquitin protein ligase
hsa-miR-379-5p	KNG1	kininogen 1
hsa-miR-379-5p	CCDC88A	coiled-coil domain containing 88A
hsa-miR-379-5p	VGLL3	vestigial like family member 3
hsa-miR-379-5p	MAP3K2	mitogen-activated protein kinase kinase kinase 2
hsa-miR-379-5p	DNAJC18	DnaJ heat shock protein family (Hsp40) member C18
hsa-miR-379-5p	TMLHE	trimethyllysine hydroxylase, epsilon
hsa-miR-379-5p	FAM76A	family with sequence similarity 76 member A
hsa-miR-379-5p	SMAD9	SMAD family member 9
hsa-miR-379-5p	TNRC6B	trinucleotide repeat containing 6B
hsa-miR-379-5p	SGPP1	sphingosine-1-phosphate phosphatase 1
hsa-miR-379-5p	METTL4	methyltransferase like 4
hsa-miR-379-5p	ZNF582	zinc finger protein 582
hsa-miR-379-5p	CFAP300	cilia and flagella associated protein 300
hsa-miR-379-5p	PEX11B	peroxisomal biogenesis factor 11 beta
hsa-miR-379-5p	SVOPL	SVOP like
hsa-miR-379-5p	TMED3	transmembrane p24 trafficking protein 3
hsa-miR-379-5p	ROR1	receptor tyrosine kinase like orphan receptor 1
hsa-miR-379-5p	PLEKHG2	pleckstrin homology and RhoGEF domain containing G2
hsa-miR-379-5p	IL18RAP	interleukin 18 receptor accessory protein
hsa-miR-379-5p	PTK2	protein tyrosine kinase 2
hsa-miR-542-3p	TMEM65	transmembrane protein 65
hsa-miR-542-3p	YPEL5	yippee like 5
hsa-miR-542-3p	FUT9	fucosyltransferase 9
hsa-miR-542-3p	GFRA1	GDNF family receptor alpha 1
hsa-miR-542-3p	VAPB	VAMP associated protein B and C
hsa-miR-542-3p	ATP8A2	ATPase phospholipid transporting 8A2
hsa-miR-542-3p	ARMC8	armadillo repeat containing 8
hsa-miR-542-3p	BRK1	BRICK1, SCAR/WAVE actin nucleating complex subunit
hsa-miR-542-3p	SERPINB8	serpin family B member 8
hsa-miR-542-3p	CCNT1	cyclin T1
hsa-miR-542-3p	FHOD3	formin homology 2 domain containing 3
hsa-miR-542-3p	ITGB1BP1	integrin subunit beta 1 binding protein 1
hsa-miR-542-3p	RBM15B	RNA binding motif protein 15B
hsa-miR-542-3p	BIRC5	baculoviral IAP repeat containing 5
hsa-miR-542-3p	DCBLD2	discoidin, CUB and LCCL domain containing 2
hsa-miR-542-3p	HS2ST1	heparan sulfate 2-O-sulfotransferase 1
hsa-miR-542-3p	GDNF	glial cell derived neurotrophic factor
hsa-miR-542-3p	DDI2	DNA damage inducible 1 homolog 2
hsa-miR-542-3p	AMMECR1	Alport syndrome, mental retardation, midface hypoplasia and elliptocytosis chromosomal region gene 1
hsa-miR-542-3p	MYH9	myosin heavy chain 9
hsa-miR-542-3p	UBE2E1	ubiquitin conjugating enzyme E2 E1
hsa-miR-542-3p	MMAB	metabolism of cobalamin associated B
hsa-miR-542-3p	COLGALT2	collagen beta(1-O)galactosyltransferase 2
hsa-miR-542-3p	JADE2	jade family PHD finger 2
hsa-miR-542-3p	MPRIP	myosin phosphatase Rho interacting protein
hsa-miR-542-3p	LYSMD4	LysM domain containing 4
hsa-miR-542-3p	FLRT3	fibronectin leucine rich transmembrane protein 3
hsa-miR-542-3p	CCDC71L	coiled-coil domain containing 71 like
hsa-miR-542-3p	KMT2E	lysine methyltransferase 2E
hsa-miR-542-3p	PAK3	p21 (RAC1) activated kinase 3
hsa-miR-542-3p	PLA2R1	phospholipase A2 receptor 1
hsa-miR-542-3p	PELI2	pellino E3 ubiquitin protein ligase family member 2
hsa-miR-542-3p	PDIA6	protein disulfide isomerase family A member 6
hsa-miR-542-3p	SNU13	small nuclear ribonucleoprotein 13
hsa-miR-542-3p	APLF	aprataxin and PNKP like factor
hsa-miR-542-3p	PRIM2	DNA primase subunit 2
hsa-miR-542-3p	FKBP1B	FKBP prolyl isomerase 1B
hsa-miR-542-3p	ITPRIP	inositol 1,4,5-trisphosphate receptor interacting protein
hsa-miR-542-3p	DCUN1D1	defective in cullin neddylation 1 domain containing 1
hsa-miR-542-3p	FBXO6	F-box protein 6
hsa-miR-542-3p	KIAA1324L	KIAA1324 like
hsa-miR-542-3p	SYT17	synaptotagmin 17
hsa-miR-542-3p	TSC22D1	TSC22 domain family member 1
hsa-miR-542-3p	MYLIP	myosin regulatory light chain interacting protein
hsa-miR-542-3p	ZFR2	zinc finger RNA binding protein 2
hsa-miR-542-3p	RPS6KA4	ribosomal protein S6 kinase A4
hsa-miR-542-3p	NKX3-1	NK3 homeobox 1
hsa-miR-542-3p	ZNF618	zinc finger protein 618
hsa-miR-542-3p	WDR33	WD repeat domain 33
hsa-miR-542-3p	PWP1	PWP1 homolog, endonuclein
hsa-miR-195-5p	PAPPA	pappalysin 1
hsa-miR-195-5p	FASN	fatty acid synthase
hsa-miR-195-5p	UNC80	unc-80 homolog, NALCN channel complex subunit
hsa-miR-195-5p	FGF2	fibroblast growth factor 2
hsa-miR-195-5p	TNRC6B	trinucleotide repeat containing 6B
hsa-miR-195-5p	PTPN4	protein tyrosine phosphatase, non-receptor type 4
hsa-miR-195-5p	PHF19	PHD finger protein 19
hsa-miR-195-5p	DESI1	desumoylating isopeptidase 1
hsa-miR-195-5p	UBE2Q1	ubiquitin conjugating enzyme E2 Q1
hsa-miR-195-5p	LSM11	LSM11, U7 small nuclear RNA associated
hsa-miR-195-5p	NECTIN1	nectin cell adhesion molecule 1
hsa-miR-195-5p	GAREM1	GRB2 associated regulator of MAPK1 subtype 1
hsa-miR-195-5p	ANKUB1	ankyrin repeat and ubiquitin domain containing 1
hsa-miR-195-5p	FBXO21	F-box protein 21
hsa-miR-195-5p	CCNE1	cyclin E1
hsa-miR-195-5p	ATG14	autophagy related 14
hsa-miR-195-5p	LUZP1	leucine zipper protein 1
hsa-miR-195-5p	SLC13A3	solute carrier family 13 member 3
hsa-miR-195-5p	ARIH1	ariadne RBR E3 ubiquitin protein ligase 1
hsa-miR-195-5p	MGAT4A	alpha-1,3-mannosyl-glycoprotein 4-beta-N-acetylglucosaminyltransferase A
hsa-miR-195-5p	EPHB2	EPH receptor B2
hsa-miR-195-5p	BTRC	beta-transducin repeat containing E3 ubiquitin protein ligase
hsa-miR-195-5p	SPRYD3	SPRY domain containing 3
hsa-miR-195-5p	ARL2	ADP ribosylation factor like GTPase 2
hsa-miR-195-5p	CASK	calcium/calmodulin dependent serine protein kinase
hsa-miR-195-5p	NUP50	nucleoporin 50
hsa-miR-195-5p	DCLK1	doublecortin like kinase 1
hsa-miR-195-5p	CYB561A3	cytochrome b561 family member A3
hsa-miR-195-5p	ZBTB46	zinc finger and BTB domain containing 46
hsa-miR-195-5p	FGF7	fibroblast growth factor 7
hsa-miR-195-5p	RECK	reversion inducing cysteine rich protein with kazal motifs
hsa-miR-195-5p	PLAG1	PLAG1 zinc finger
hsa-miR-195-5p	AXIN2	axin 2
hsa-miR-195-5p	GPR63	G protein-coupled receptor 63
hsa-miR-195-5p	SYNJ1	synaptojanin 1
hsa-miR-195-5p	ABL2	ABL proto-oncogene 2, non-receptor tyrosine kinase
hsa-miR-195-5p	SCN8A	sodium voltage-gated channel alpha subunit 8
hsa-miR-195-5p	CACNA1E	calcium voltage-gated channel subunit alpha1 E
hsa-miR-195-5p	PISD	phosphatidylserine decarboxylase
hsa-miR-195-5p	KCNJ2	potassium voltage-gated channel subfamily J member 2
hsa-miR-195-5p	C2orf42	chromosome 2 open reading frame 42
hsa-miR-195-5p	UBE2V1	ubiquitin conjugating enzyme E2 V1
hsa-miR-195-5p	KIF1B	kinesin family member 1B
hsa-miR-195-5p	SPRED1	sprouty related EVH1 domain containing 1
hsa-miR-195-5p	SREK1	splicing regulatory glutamic acid and lysine rich protein 1
hsa-miR-195-5p	TBL1XR1	transducin beta like 1 X-linked receptor 1
hsa-miR-195-5p	MTMR3	myotubularin related protein 3
hsa-miR-195-5p	TLK1	tousled like kinase 1
hsa-miR-195-5p	SLC11A2	solute carrier family 11 member 2
hsa-miR-195-5p	MOB3B	MOB kinase activator 3B
hsa-miR-548l	STXBP5	syntaxin binding protein 5
hsa-miR-548l	MSI2	musashi RNA binding protein 2
hsa-miR-548l	IGF2BP3	insulin like growth factor 2 mRNA binding protein 3
hsa-miR-548l	INPP5A	inositol polyphosphate-5-phosphatase A
hsa-miR-548l	TBC1D8B	TBC1 domain family member 8B
hsa-miR-548l	EXOC5	exocyst complex component 5
hsa-miR-548l	ZSCAN12	zinc finger and SCAN domain containing 12
hsa-miR-548l	PKN2	protein kinase N2
hsa-miR-548l	NDC1	NDC1 transmembrane nucleoporin
hsa-miR-548l	CNTN1	contactin 1
hsa-miR-548l	SLAIN1	SLAIN motif family member 1
hsa-miR-548l	SEC61A2	Sec61 translocon alpha 2 subunit
hsa-miR-548l	MTCP1	mature T cell proliferation 1
hsa-miR-548l	ZEB2	zinc finger E-box binding homeobox 2
hsa-miR-548l	GOPC	golgi associated PDZ and coiled-coil motif containing
hsa-miR-548l	UBE2A	ubiquitin conjugating enzyme E2 A
hsa-miR-548l	CRIPT	CXXC repeat containing interactor of PDZ3 domain
hsa-miR-548l	PDZD8	PDZ domain containing 8
hsa-miR-548l	SYNJ1	synaptojanin 1
hsa-miR-548l	APPBP2	amyloid beta precursor protein binding protein 2
hsa-miR-548l	NEGR1	neuronal growth regulator 1
hsa-miR-548l	KCTD5	potassium channel tetramerization domain containing 5
hsa-miR-548l	NUP160	nucleoporin 160
hsa-miR-548l	DYNLT1	dynein light chain Tctex-type 1
hsa-miR-548l	FEM1C	fem-1 homolog C
hsa-miR-548l	NFIA	nuclear factor I A
hsa-miR-548l	MTPN	myotrophin
hsa-miR-548l	RHOQ	ras homolog family member Q
hsa-miR-548l	PPP6C	protein phosphatase 6 catalytic subunit
hsa-miR-548l	HOOK3	hook microtubule tethering protein 3
hsa-miR-548l	ABCB5	ATP binding cassette subfamily B member 5
hsa-miR-548l	RAP1A	RAP1A, member of RAS oncogene family
hsa-miR-548l	MBD2	methyl-CpG binding domain protein 2
hsa-miR-548l	APPL1	adaptor protein, phosphotyrosine interacting with PH domain and leucine zipper 1
hsa-miR-548l	SLC30A4	solute carrier family 30 member 4
hsa-miR-548l	PGM2	phosphoglucomutase 2
hsa-miR-548l	TBCA	tubulin folding cofactor A
hsa-miR-548l	RAB21	RAB21, member RAS oncogene family
hsa-miR-548l	LRP8	LDL receptor related protein 8
hsa-miR-548l	PLEKHJ1	pleckstrin homology domain containing J1
hsa-miR-548l	SACS	sacsin molecular chaperone
hsa-miR-548l	EPC2	enhancer of polycomb homolog 2
hsa-miR-548l	MYCN	MYCN proto-oncogene, bHLH transcription factor
hsa-miR-548l	SH3RF1	SH3 domain containing ring finger 1
hsa-miR-548l	PIBF1	progesterone immunomodulatory binding factor 1
hsa-miR-548l	ACVR2A	activin A receptor type 2A
hsa-miR-548l	MTF1	metal regulatory transcription factor 1
hsa-miR-548l	MDGA2	MAM domain containing glycosylphosphatidylinositol anchor 2
hsa-miR-548l	SNTG1	syntrophin gamma 1
hsa-miR-548l	F3	coagulation factor III, tissue factor
hsa-miR-3130-5p	MYCN	MYCN proto-oncogene, bHLH transcription factor
hsa-miR-3130-5p	VPS54	VPS54, GARP complex subunit
hsa-miR-3130-5p	RALA	RAS like proto-oncogene A
hsa-miR-3130-5p	LNPK	lunapark, ER junction formation factor
hsa-miR-3130-5p	UPF1	UPF1, RNA helicase and ATPase
hsa-miR-3130-5p	ZRANB1	zinc finger RANBP2-type containing 1
hsa-miR-3130-5p	CCDC173	coiled-coil domain containing 173
hsa-miR-3130-5p	CLCN5	chloride voltage-gated channel 5
hsa-miR-3130-5p	TCF7	transcription factor 7
hsa-miR-3130-5p	ASIC1	acid sensing ion channel subunit 1
hsa-miR-3130-5p	ANKH	ANKH inorganic pyrophosphate transport regulator
hsa-miR-3130-5p	MRPL35	mitochondrial ribosomal protein L35
hsa-miR-3130-5p	ALG10	ALG10, alpha-1,2-glucosyltransferase
hsa-miR-3130-5p	KRTAP3-2	keratin associated protein 3-2
hsa-miR-3130-5p	ZMYM2	zinc finger MYM-type containing 2
hsa-miR-3130-5p	MKRN1	makorin ring finger protein 1
hsa-miR-3130-5p	ANKRD34A	ankyrin repeat domain 34A
hsa-miR-3130-5p	TAF7	TATA-box binding protein associated factor 7
hsa-miR-3130-5p	YAP1	Yes associated protein 1
hsa-miR-3130-5p	SMARCE1	SWI/SNF related, matrix associated, actin dependent regulator of chromatin, subfamily e, member 1
hsa-miR-3130-5p	ATL1	atlastin GTPase 1
hsa-miR-3130-5p	OSBP	oxysterol binding protein
hsa-miR-3130-5p	ADCY1	adenylate cyclase 1
hsa-miR-3130-5p	EPHA7	EPH receptor A7
hsa-miR-3130-5p	CWC25	CWC25 spliceosome associated protein homolog
hsa-miR-3130-5p	CCDC83	coiled-coil domain containing 83
hsa-miR-3130-5p	CBWD3	COBW domain containing 3
hsa-miR-3130-5p	CBWD2	COBW domain containing 2
hsa-miR-3130-5p	CBWD5	COBW domain containing 5
hsa-miR-3130-5p	SCN1A	sodium voltage-gated channel alpha subunit 1
hsa-miR-3130-5p	CBWD1	COBW domain containing 1
hsa-miR-3130-5p	CBWD6	COBW domain containing 6
hsa-miR-3130-5p	CDH18	cadherin 18
hsa-miR-3130-5p	ACVRL1	activin A receptor like type 1
hsa-miR-3130-5p	RRN3	RRN3 homolog, RNA polymerase I transcription factor
hsa-miR-3130-5p	KANSL1L	KAT8 regulatory NSL complex subunit 1 like
hsa-miR-3130-5p	VAV2	vav guanine nucleotide exchange factor 2
hsa-miR-3130-5p	FOXA3	forkhead box A3
hsa-miR-3130-5p	DMAC1	distal membrane arm assembly complex 1
hsa-miR-3130-5p	FCRL1	Fc receptor like 1
hsa-miR-3130-5p	PMPCB	peptidase, mitochondrial processing beta subunit
hsa-miR-3130-5p	TM9SF3	transmembrane 9 superfamily member 3
hsa-miR-3130-5p	PBX1	PBX homeobox 1
hsa-miR-3130-5p	JAGN1	jagunal homolog 1
hsa-miR-3130-5p	SAMD5	sterile alpha motif domain containing 5
hsa-miR-3130-5p	AKIRIN1	akirin 1
hsa-miR-3130-5p	ST6GAL1	ST6 beta-galactoside alpha-2,6-sialyltransferase 1
hsa-miR-3130-5p	SETD6	SET domain containing 6, protein lysine methyltransferase
hsa-miR-3130-5p	ZC3HAV1	zinc finger CCCH-type containing, antiviral 1
hsa-miR-3130-5p	NCOA7	nuclear receptor coactivator 7
hsa-miR-519d-3p	ENPP5	ectonucleotide pyrophosphatase/phosphodiesterase 5 (putative)
hsa-miR-519d-3p	FYCO1	FYVE and coiled-coil domain containing 1
hsa-miR-519d-3p	DYNC1LI2	dynein cytoplasmic 1 light intermediate chain 2
hsa-miR-519d-3p	ZNFX1	zinc finger NFX1-type containing 1
hsa-miR-519d-3p	NPAT	nuclear protein, coactivator of histone transcription
hsa-miR-519d-3p	MED12L	mediator complex subunit 12 like
hsa-miR-519d-3p	TBC1D20	TBC1 domain family member 20
hsa-miR-519d-3p	ZNF800	zinc finger protein 800
hsa-miR-519d-3p	NPAS2	neuronal PAS domain protein 2
hsa-miR-519d-3p	SAR1B	secretion associated Ras related GTPase 1B
hsa-miR-519d-3p	BRMS1L	BRMS1 like transcriptional repressor
hsa-miR-519d-3p	ANKRD52	ankyrin repeat domain 52
hsa-miR-519d-3p	VLDLR	very low density lipoprotein receptor
hsa-miR-519d-3p	TXNIP	thioredoxin interacting protein
hsa-miR-519d-3p	KCNB1	potassium voltage-gated channel subfamily B member 1
hsa-miR-519d-3p	CLOCK	clock circadian regulator
hsa-miR-519d-3p	RUFY2	RUN and FYVE domain containing 2
hsa-miR-519d-3p	ARHGAP12	Rho GTPase activating protein 12
hsa-miR-519d-3p	STK17B	serine/threonine kinase 17b
hsa-miR-519d-3p	PDCD1LG2	programmed cell death 1 ligand 2
hsa-miR-519d-3p	ZFYVE26	zinc finger FYVE-type containing 26
hsa-miR-519d-3p	RAB22A	RAB22A, member RAS oncogene family
hsa-miR-519d-3p	SLC40A1	solute carrier family 40 member 1
hsa-miR-519d-3p	GPR137C	G protein-coupled receptor 137C
hsa-miR-519d-3p	REEP3	receptor accessory protein 3
hsa-miR-519d-3p	RRAGD	Ras related GTP binding D
hsa-miR-519d-3p	TBC1D9	TBC1 domain family member 9
hsa-miR-519d-3p	PKD2	polycystin 2, transient receptor potential cation channel
hsa-miR-519d-3p	ZNF827	zinc finger protein 827
hsa-miR-519d-3p	MAP3K2	mitogen-activated protein kinase kinase kinase 2
hsa-miR-519d-3p	NAPEPLD	N-acyl phosphatidylethanolamine phospholipase D
hsa-miR-519d-3p	ARID4B	AT-rich interaction domain 4B
hsa-miR-519d-3p	EPHA4	EPH receptor A4
hsa-miR-519d-3p	FAM45A	family with sequence similarity 45 member A
hsa-miR-519d-3p	EPHA5	EPH receptor A5
hsa-miR-519d-3p	GPR6	G protein-coupled receptor 6
hsa-miR-519d-3p	ITGB8	integrin subunit beta 8
hsa-miR-519d-3p	E2F1	E2F transcription factor 1
hsa-miR-519d-3p	KCNK10	potassium two pore domain channel subfamily K member 10
hsa-miR-519d-3p	FCHO2	FCH domain only 2
hsa-miR-519d-3p	USP46	ubiquitin specific peptidase 46
hsa-miR-519d-3p	NFAT5	nuclear factor of activated T cells 5
hsa-miR-519d-3p	C2CD2	C2 calcium dependent domain containing 2
hsa-miR-519d-3p	RNF128	ring finger protein 128, E3 ubiquitin protein ligase
hsa-miR-519d-3p	EZH1	enhancer of zeste 1 polycomb repressive complex 2 subunit
hsa-miR-519d-3p	RGL1	ral guanine nucleotide dissociation stimulator like 1
hsa-miR-519d-3p	MKRN1	makorin ring finger protein 1
hsa-miR-519d-3p	ITPRIPL2	ITPRIP like 2
hsa-miR-519d-3p	ZNF367	zinc finger protein 367
hsa-miR-519d-3p	PLEKHA3	pleckstrin homology domain containing A3
hsa-miR-490-5p	SHISA7	shisa family member 7
hsa-miR-490-5p	FOS	Fos proto-oncogene, AP-1 transcription factor subunit
hsa-miR-490-5p	TTC29	tetratricopeptide repeat domain 29
hsa-miR-490-5p	YWHAB	tyrosine 3-monooxygenase/tryptophan 5-monooxygenase activation protein beta
hsa-miR-490-5p	ALDH1A2	aldehyde dehydrogenase 1 family member A2
hsa-miR-490-5p	GCH1	GTP cyclohydrolase 1
hsa-miR-490-5p	SPRED3	sprouty related EVH1 domain containing 3
hsa-miR-490-5p	WDR44	WD repeat domain 44
hsa-miR-490-5p	APPL1	adaptor protein, phosphotyrosine interacting with PH domain and leucine zipper 1
hsa-miR-490-5p	CXorf56	chromosome X open reading frame 56
hsa-miR-490-5p	CST8	cystatin 8
hsa-miR-490-5p	TOX3	TOX high mobility group box family member 3
hsa-miR-490-5p	C1orf43	chromosome 1 open reading frame 43
hsa-miR-490-5p	LMOD1	leiomodin 1
hsa-miR-490-5p	ALG10B	ALG10B, alpha-1,2-glucosyltransferase
hsa-miR-490-5p	ARPP19	cAMP regulated phosphoprotein 19
hsa-miR-490-5p	ADCYAP1	adenylate cyclase activating polypeptide 1
hsa-miR-490-5p	BAZ2B	bromodomain adjacent to zinc finger domain 2B
hsa-miR-490-5p	CNTN3	contactin 3
hsa-miR-490-5p	HPS5	HPS5, biogenesis of lysosomal organelles complex 2 subunit 2
hsa-miR-490-5p	LAMTOR3	late endosomal/lysosomal adaptor, MAPK and MTOR activator 3
hsa-miR-490-5p	ZNF347	zinc finger protein 347
hsa-miR-490-5p	TAOK1	TAO kinase 1
hsa-miR-490-5p	COLEC11	collectin subfamily member 11
hsa-miR-490-5p	FAM84A	family with sequence similarity 84 member A
hsa-miR-490-5p	RANBP10	RAN binding protein 10
hsa-miR-490-5p	INHBC	inhibin subunit beta C
hsa-miR-490-5p	SERPINB10	serpin family B member 10
hsa-miR-490-5p	USP37	ubiquitin specific peptidase 37
hsa-miR-490-5p	P4HA1	prolyl 4-hydroxylase subunit alpha 1
hsa-miR-490-5p	PKD2	polycystin 2, transient receptor potential cation channel
hsa-miR-490-5p	NBR1	NBR1, autophagy cargo receptor
hsa-miR-490-5p	KIRREL1	kirre like nephrin family adhesion molecule 1
hsa-miR-490-5p	GPALPP1	GPALPP motifs containing 1
hsa-miR-490-5p	ARHGAP26	Rho GTPase activating protein 26
hsa-miR-490-5p	C11orf58	chromosome 11 open reading frame 58
hsa-miR-490-5p	RTL3	retrotransposon Gag like 3
hsa-miR-490-5p	ADGRF3	adhesion G protein-coupled receptor F3
hsa-miR-490-5p	BORA	bora, aurora kinase A activator
hsa-miR-490-5p	COA5	cytochrome c oxidase assembly factor 5
hsa-miR-490-5p	ARHGAP42	Rho GTPase activating protein 42
hsa-miR-490-5p	EMCN	endomucin
hsa-miR-490-5p	ZEB2	zinc finger E-box binding homeobox 2
hsa-miR-490-5p	UNC80	unc-80 homolog, NALCN channel complex subunit
hsa-miR-490-5p	LCOR	ligand dependent nuclear receptor corepressor
hsa-miR-490-5p	F8A1	coagulation factor VIII associated 1
hsa-miR-490-5p	WLS	Wnt ligand secretion mediator
hsa-miR-490-5p	STAT5B	signal transducer and activator of transcription 5B
hsa-miR-490-5p	ZNF770	zinc finger protein 770
hsa-miR-490-5p	SHISA9	shisa family member 9
hsa-miR-450b-5p	FOXN3	forkhead box N3
hsa-miR-450b-5p	CDC42EP3	CDC42 effector protein 3
hsa-miR-450b-5p	AUTS2	AUTS2, activator of transcription and developmental regulator
hsa-miR-450b-5p	HIPK1	homeodomain interacting protein kinase 1
hsa-miR-450b-5p	ANK3	ankyrin 3
hsa-miR-450b-5p	LPGAT1	lysophosphatidylglycerol acyltransferase 1
hsa-miR-450b-5p	PBX1	PBX homeobox 1
hsa-miR-450b-5p	ATP11C	ATPase phospholipid transporting 11C
hsa-miR-450b-5p	ANKRD12	ankyrin repeat domain 12
hsa-miR-450b-5p	CENPK	centromere protein K
hsa-miR-450b-5p	TAOK1	TAO kinase 1
hsa-miR-450b-5p	BACH2	BTB domain and CNC homolog 2
hsa-miR-450b-5p	ELAVL4	ELAV like RNA binding protein 4
hsa-miR-450b-5p	AGO3	argonaute RISC catalytic component 3
hsa-miR-450b-5p	MAP2	microtubule associated protein 2
hsa-miR-450b-5p	GNAQ	G protein subunit alpha q
hsa-miR-450b-5p	MRPL35	mitochondrial ribosomal protein L35
hsa-miR-450b-5p	LEPROT	leptin receptor overlapping transcript
hsa-miR-450b-5p	SLC17A6	solute carrier family 17 member 6
hsa-miR-450b-5p	RBMS3	RNA binding motif single stranded interacting protein 3
hsa-miR-450b-5p	PDE10A	phosphodiesterase 10A
hsa-miR-450b-5p	TNPO1	transportin 1
hsa-miR-450b-5p	DENND1B	DENN domain containing 1B
hsa-miR-450b-5p	IRF2BPL	interferon regulatory factor 2 binding protein like
hsa-miR-450b-5p	ZNF367	zinc finger protein 367
hsa-miR-450b-5p	ZBTB20	zinc finger and BTB domain containing 20
hsa-miR-450b-5p	BPTF	bromodomain PHD finger transcription factor
hsa-miR-450b-5p	GGNBP2	gametogenetin binding protein 2
hsa-miR-450b-5p	TRO	trophinin
hsa-miR-450b-5p	AGPAT5	1-acylglycerol-3-phosphate O-acyltransferase 5
hsa-miR-450b-5p	UBR1	ubiquitin protein ligase E3 component n-recognin 1
hsa-miR-450b-5p	ZBTB43	zinc finger and BTB domain containing 43
hsa-miR-450b-5p	CMTM8	CKLF like MARVEL transmembrane domain containing 8
hsa-miR-450b-5p	ECT2	epithelial cell transforming 2
hsa-miR-450b-5p	CFL2	cofilin 2
hsa-miR-450b-5p	ETV6	ETS variant 6
hsa-miR-450b-5p	CDYL2	chromodomain Y like 2
hsa-miR-450b-5p	CAMTA1	calmodulin binding transcription activator 1
hsa-miR-450b-5p	HMGB2	high mobility group box 2
hsa-miR-450b-5p	TFRC	transferrin receptor
hsa-miR-450b-5p	CNTN5	contactin 5
hsa-miR-450b-5p	TMEM255A	transmembrane protein 255A
hsa-miR-450b-5p	PRTG	protogenin
hsa-miR-450b-5p	SOX21	SRY-box 21
hsa-miR-450b-5p	SPTBN4	spectrin beta, non-erythrocytic 4
hsa-miR-450b-5p	PAX9	paired box 9
hsa-miR-450b-5p	UCHL5	ubiquitin C-terminal hydrolase L5
hsa-miR-450b-5p	CHMP2B	charged multivesicular body protein 2B
hsa-miR-450b-5p	RARG	retinoic acid receptor gamma
hsa-miR-450b-5p	MEF2C	myocyte enhancer factor 2C
hsa-miR-374b-5p	PRDM11	PR/SET domain 11
hsa-miR-374b-5p	PARP8	poly(ADP-ribose) polymerase family member 8
hsa-miR-374b-5p	UBE3A	ubiquitin protein ligase E3A
hsa-miR-374b-5p	HIBADH	3-hydroxyisobutyrate dehydrogenase
hsa-miR-374b-5p	CADM2	cell adhesion molecule 2
hsa-miR-374b-5p	N4BP2	NEDD4 binding protein 2
hsa-miR-374b-5p	ACVR2B	activin A receptor type 2B
hsa-miR-374b-5p	GABRG1	gamma-aminobutyric acid type A receptor gamma1 subunit
hsa-miR-374b-5p	ZNF423	zinc finger protein 423
hsa-miR-374b-5p	EN1	engrailed homeobox 1
hsa-miR-374b-5p	ADD3	adducin 3
hsa-miR-374b-5p	NHLRC2	NHL repeat containing 2
hsa-miR-374b-5p	NETO1	neuropilin and tolloid like 1
hsa-miR-374b-5p	MCTP2	multiple C2 and transmembrane domain containing 2
hsa-miR-374b-5p	AHR	aryl hydrocarbon receptor
hsa-miR-374b-5p	CEBPB	CCAAT enhancer binding protein beta
hsa-miR-374b-5p	TACC1	transforming acidic coiled-coil containing protein 1
hsa-miR-374b-5p	RNF180	ring finger protein 180
hsa-miR-374b-5p	ZSWIM6	zinc finger SWIM-type containing 6
hsa-miR-374b-5p	CCDC34	coiled-coil domain containing 34
hsa-miR-374b-5p	RORA	RAR related orphan receptor A
hsa-miR-374b-5p	ACSL6	acyl-CoA synthetase long chain family member 6
hsa-miR-374b-5p	PAQR3	progestin and adipoQ receptor family member 3
hsa-miR-374b-5p	MKX	mohawk homeobox
hsa-miR-374b-5p	TMEM108	transmembrane protein 108
hsa-miR-374b-5p	GABRG2	gamma-aminobutyric acid type A receptor gamma2 subunit
hsa-miR-374b-5p	PRRG1	proline rich and Gla domain 1
hsa-miR-374b-5p	MMP14	matrix metallopeptidase 14
hsa-miR-374b-5p	VSTM2A	V-set and transmembrane domain containing 2A
hsa-miR-374b-5p	TMEM245	transmembrane protein 245
hsa-miR-374b-5p	MACC1	MET transcriptional regulator MACC1
hsa-miR-374b-5p	PITX2	paired like homeodomain 2
hsa-miR-374b-5p	LDLRAD4	low density lipoprotein receptor class A domain containing 4
hsa-miR-374b-5p	NGLY1	N-glycanase 1
hsa-miR-374b-5p	IGFBP3	insulin like growth factor binding protein 3
hsa-miR-374b-5p	TMPRSS11B	transmembrane serine protease 11B
hsa-miR-374b-5p	EXOC7	exocyst complex component 7
hsa-miR-374b-5p	ITGA2	integrin subunit alpha 2
hsa-miR-374b-5p	DMXL1	Dmx like 1
hsa-miR-374b-5p	PDE4B	phosphodiesterase 4B
hsa-miR-374b-5p	ACAN	aggrecan
hsa-miR-374b-5p	ZFP37	ZFP37 zinc finger protein
hsa-miR-374b-5p	AHI1	Abelson helper integration site 1
hsa-miR-374b-5p	ATAD2	ATPase family, AAA domain containing 2
hsa-miR-374b-5p	RSF1	remodeling and spacing factor 1
hsa-miR-374b-5p	PDE10A	phosphodiesterase 10A
hsa-miR-374b-5p	TBC1D23	TBC1 domain family member 23
hsa-miR-374b-5p	NEUROG2	neurogenin 2
hsa-miR-374b-5p	TMEM192	transmembrane protein 192
hsa-miR-374b-5p	RABEP1	rabaptin, RAB GTPase binding effector protein 1
hsa-miR-374c-3p	GABRB2	gamma-aminobutyric acid type A receptor beta2 subunit
hsa-miR-374c-3p	CEP128	centrosomal protein 128
hsa-miR-374c-3p	ARID4A	AT-rich interaction domain 4A
hsa-miR-374c-3p	CCDC32	coiled-coil domain containing 32
hsa-miR-374c-3p	CEP44	centrosomal protein 44
hsa-miR-374c-3p	VCL	vinculin
hsa-miR-374c-3p	L3MBTL3	L3MBTL3, histone methyl-lysine binding protein
hsa-miR-374c-3p	DLD	dihydrolipoamide dehydrogenase
hsa-miR-374c-3p	CACNB4	calcium voltage-gated channel auxiliary subunit beta 4
hsa-miR-374c-3p	CHUK	conserved helix-loop-helix ubiquitous kinase
hsa-miR-374c-3p	GTF3C3	general transcription factor IIIC subunit 3
hsa-miR-374c-3p	MTFR1	mitochondrial fission regulator 1
hsa-miR-374c-3p	PCDH17	protocadherin 17
hsa-miR-374c-3p	ZKSCAN2	zinc finger with KRAB and SCAN domains 2
hsa-miR-374c-3p	TBC1D9	TBC1 domain family member 9
hsa-miR-374c-3p	HNMT	histamine N-methyltransferase
hsa-miR-374c-3p	PTN	pleiotrophin
hsa-miR-374c-3p	CREB3L2	cAMP responsive element binding protein 3 like 2
hsa-miR-374c-3p	CAMSAP2	calmodulin regulated spectrin associated protein family member 2
hsa-miR-374c-3p	MSL2	MSL complex subunit 2
hsa-miR-374c-3p	ACSL1	acyl-CoA synthetase long chain family member 1
hsa-miR-374c-3p	ST6GALNAC3	ST6 N-acetylgalactosaminide alpha-2,6-sialyltransferase 3
hsa-miR-374c-3p	HMGB2	high mobility group box 2
hsa-miR-374c-3p	PELI1	pellino E3 ubiquitin protein ligase 1
hsa-miR-374c-3p	ERLIN2	ER lipid raft associated 2
hsa-miR-374c-3p	FAM120A	family with sequence similarity 120A
hsa-miR-374c-3p	GRIA3	glutamate ionotropic receptor AMPA type subunit 3
hsa-miR-374c-3p	LAMP2	lysosomal associated membrane protein 2
hsa-miR-374c-3p	SLC9A9	solute carrier family 9 member A9
hsa-miR-374c-3p	MMEL1	membrane metalloendopeptidase like 1
hsa-miR-374c-3p	FAM13C	family with sequence similarity 13 member C
hsa-miR-374c-3p	SLC12A2	solute carrier family 12 member 2
hsa-miR-374c-3p	MMGT1	membrane magnesium transporter 1
hsa-miR-374c-3p	RBM14-RBM4	RBM14-RBM4 readthrough
hsa-miR-374c-3p	RBM4	RNA binding motif protein 4
hsa-miR-374c-3p	PFN4	profilin family member 4
hsa-miR-374c-3p	NEDD1	neural precursor cell expressed, developmentally down-regulated 1
hsa-miR-374c-3p	MAP10	microtubule associated protein 10
hsa-miR-374c-3p	FAM160B1	family with sequence similarity 160 member B1
hsa-miR-374c-3p	FBXW11	F-box and WD repeat domain containing 11
hsa-miR-374c-3p	FPR2	formyl peptide receptor 2
hsa-miR-374c-3p	DCUN1D5	defective in cullin neddylation 1 domain containing 5
hsa-miR-374c-3p	ZDHHC13	zinc finger DHHC-type containing 13
hsa-miR-374c-3p	ONECUT2	one cut homeobox 2
hsa-miR-374c-3p	KIAA0391	KIAA0391
hsa-miR-374c-3p	DZIP1	DAZ interacting zinc finger protein 1
hsa-miR-374c-3p	REL	REL proto-oncogene, NF-kB subunit
hsa-miR-374c-3p	SFPQ	splicing factor proline and glutamine rich
hsa-miR-374c-3p	NDNF	neuron derived neurotrophic factor
hsa-miR-374c-3p	GULP1	GULP PTB domain containing engulfment adaptor 1
hsa-miR-449a	HCN3	hyperpolarization activated cyclic nucleotide gated potassium channel 3
hsa-miR-449a	FAM167A	family with sequence similarity 167 member A
hsa-miR-449a	RAP1GDS1	Rap1 GTPase-GDP dissociation stimulator 1
hsa-miR-449a	DLL1	delta like canonical Notch ligand 1
hsa-miR-449a	FAM76A	family with sequence similarity 76 member A
hsa-miR-449a	SDK2	sidekick cell adhesion molecule 2
hsa-miR-449a	MDM4	MDM4, p53 regulator
hsa-miR-449a	E2F5	E2F transcription factor 5
hsa-miR-449a	SYT1	synaptotagmin 1
hsa-miR-449a	SCN2B	sodium voltage-gated channel beta subunit 2
hsa-miR-449a	NAV3	neuron navigator 3
hsa-miR-449a	MGAT4A	alpha-1,3-mannosyl-glycoprotein 4-beta-N-acetylglucosaminyltransferase A
hsa-miR-449a	FKBP1B	FKBP prolyl isomerase 1B
hsa-miR-449a	PPP1R11	protein phosphatase 1 regulatory inhibitor subunit 11
hsa-miR-449a	SATB2	SATB homeobox 2
hsa-miR-449a	MET	MET proto-oncogene, receptor tyrosine kinase
hsa-miR-449a	LGR4	leucine rich repeat containing G protein-coupled receptor 4
hsa-miR-449a	TGIF2	TGFB induced factor homeobox 2
hsa-miR-449a	MYCN	MYCN proto-oncogene, bHLH transcription factor
hsa-miR-449a	XYLT1	xylosyltransferase 1
hsa-miR-449a	NECTIN1	nectin cell adhesion molecule 1
hsa-miR-449a	NAV1	neuron navigator 1
hsa-miR-449a	FLOT2	flotillin 2
hsa-miR-449a	CELF3	CUGBP Elav-like family member 3
hsa-miR-449a	PACS1	phosphofurin acidic cluster sorting protein 1
hsa-miR-449a	VAMP2	vesicle associated membrane protein 2
hsa-miR-449a	PKP4	plakophilin 4
hsa-miR-449a	CACNA1E	calcium voltage-gated channel subunit alpha1 E
hsa-miR-449a	RRAS	RAS related
hsa-miR-449a	SHANK3	SH3 and multiple ankyrin repeat domains 3
hsa-miR-449a	ABR	ABR, RhoGEF and GTPase activating protein
hsa-miR-449a	AHCYL2	adenosylhomocysteinase like 2
hsa-miR-449a	FUT9	fucosyltransferase 9
hsa-miR-449a	SLC25A27	solute carrier family 25 member 27
hsa-miR-449a	PITPNC1	phosphatidylinositol transfer protein cytoplasmic 1
hsa-miR-449a	MPP2	membrane palmitoylated protein 2
hsa-miR-449a	CAMTA1	calmodulin binding transcription activator 1
hsa-miR-449a	MLLT3	MLLT3, super elongation complex subunit
hsa-miR-449a	NPNT	nephronectin
hsa-miR-449a	CYREN	cell cycle regulator of NHEJ
hsa-miR-449a	TBL1XR1	transducin beta like 1 X-linked receptor 1
hsa-miR-449a	SRPRA	SRP receptor subunit alpha
hsa-miR-449a	FUT8	fucosyltransferase 8
hsa-miR-449a	MEX3C	mex-3 RNA binding family member C
hsa-miR-449a	TPPP	tubulin polymerization promoting protein
hsa-miR-449a	TOB2	transducer of ERBB2, 2
hsa-miR-449a	FOXP1	forkhead box P1
hsa-miR-449a	CUEDC1	CUE domain containing 1
hsa-miR-449a	SNAI1	snail family transcriptional repressor 1
hsa-miR-449a	TMEM255A	transmembrane protein 255A
hsa-miR-143-3p	ABL2	ABL proto-oncogene 2, non-receptor tyrosine kinase
hsa-miR-143-3p	VASH1	vasohibin 1
hsa-miR-143-3p	DENND1B	DENN domain containing 1B
hsa-miR-143-3p	ITM2B	integral membrane protein 2B
hsa-miR-143-3p	MSI2	musashi RNA binding protein 2
hsa-miR-143-3p	EPM2AIP1	EPM2A interacting protein 1
hsa-miR-143-3p	GXYLT1	glucoside xylosyltransferase 1
hsa-miR-143-3p	AKAP13	A-kinase anchoring protein 13
hsa-miR-143-3p	MYO6	myosin VI
hsa-miR-143-3p	IGFBP5	insulin like growth factor binding protein 5
hsa-miR-143-3p	ZBTB44	zinc finger and BTB domain containing 44
hsa-miR-143-3p	ASAP3	ArfGAP with SH3 domain, ankyrin repeat and PH domain 3
hsa-miR-143-3p	AHCYL1	adenosylhomocysteinase like 1
hsa-miR-143-3p	DCLK1	doublecortin like kinase 1
hsa-miR-143-3p	PSME4	proteasome activator subunit 4
hsa-miR-143-3p	TTPA	alpha tocopherol transfer protein
hsa-miR-143-3p	MEDAG	mesenteric estrogen dependent adipogenesis
hsa-miR-143-3p	KRAS	KRAS proto-oncogene, GTPase
hsa-miR-143-3p	SLC16A2	solute carrier family 16 member 2
hsa-miR-143-3p	GOLM1	golgi membrane protein 1
hsa-miR-143-3p	BRD2	bromodomain containing 2
hsa-miR-143-3p	HIPK2	homeodomain interacting protein kinase 2
hsa-miR-143-3p	NECAP1	NECAP endocytosis associated 1
hsa-miR-143-3p	MYO5A	myosin VA
hsa-miR-143-3p	BAAT	bile acid-CoA:amino acid N-acyltransferase
hsa-miR-143-3p	TRAPPC8	trafficking protein particle complex 8
hsa-miR-143-3p	EME1	essential meiotic structure-specific endonuclease 1
hsa-miR-143-3p	ARHGAP26	Rho GTPase activating protein 26
hsa-miR-143-3p	CRELD1	cysteine rich with EGF like domains 1
hsa-miR-143-3p	NEURL1	neuralized E3 ubiquitin protein ligase 1
hsa-miR-143-3p	ATP10A	ATPase phospholipid transporting 10A (putative)
hsa-miR-143-3p	KAT6A	lysine acetyltransferase 6A
hsa-miR-143-3p	SRSF11	serine and arginine rich splicing factor 11
hsa-miR-143-3p	RECQL5	RecQ like helicase 5
hsa-miR-143-3p	DIP2B	disco interacting protein 2 homolog B
hsa-miR-143-3p	MGP	matrix Gla protein
hsa-miR-143-3p	MOGS	mannosyl-oligosaccharide glucosidase
hsa-miR-143-3p	PC	pyruvate carboxylase
hsa-miR-143-3p	USP24	ubiquitin specific peptidase 24
hsa-miR-143-3p	SEMA5A	semaphorin 5A
hsa-miR-143-3p	FRS2	fibroblast growth factor receptor substrate 2
hsa-miR-143-3p	DISC1	DISC1 scaffold protein
hsa-miR-143-3p	FNDC3B	fibronectin type III domain containing 3B
hsa-miR-143-3p	VAX1	ventral anterior homeobox 1
hsa-miR-143-3p	ABHD14A	abhydrolase domain containing 14A
hsa-miR-143-3p	VAPB	VAMP associated protein B and C
hsa-miR-143-3p	EIF2AK3	eukaryotic translation initiation factor 2 alpha kinase 3
hsa-miR-143-3p	ZWILCH	zwilch kinetochore protein
hsa-miR-143-3p	PHF6	PHD finger protein 6
hsa-miR-143-3p	STRN3	striatin 3
hsa-miR-21-3p	STK38L	serine/threonine kinase 38 like
hsa-miR-21-3p	PCDH19	protocadherin 19
hsa-miR-21-3p	LAMP1	lysosomal associated membrane protein 1
hsa-miR-21-3p	GRIA2	glutamate ionotropic receptor AMPA type subunit 2
hsa-miR-21-3p	TOGARAM1	TOG array regulator of axonemal microtubules 1
hsa-miR-21-3p	ATP1B1	ATPase Na+/K+ transporting subunit beta 1
hsa-miR-21-3p	TSC22D2	TSC22 domain family member 2
hsa-miR-21-3p	NAP1L5	nucleosome assembly protein 1 like 5
hsa-miR-21-3p	UBE4B	ubiquitination factor E4B
hsa-miR-21-3p	ZNF326	zinc finger protein 326
hsa-miR-21-3p	CDK8	cyclin dependent kinase 8
hsa-miR-21-3p	MAP2K4	mitogen-activated protein kinase kinase 4
hsa-miR-21-3p	AKAP11	A-kinase anchoring protein 11
hsa-miR-21-3p	GPM6A	glycoprotein M6A
hsa-miR-21-3p	MAP3K1	mitogen-activated protein kinase kinase kinase 1
hsa-miR-21-3p	PARD3B	par-3 family cell polarity regulator beta
hsa-miR-21-3p	ALCAM	activated leukocyte cell adhesion molecule
hsa-miR-21-3p	FOXO3	forkhead box O3
hsa-miR-21-3p	FYTTD1	forty-two-three domain containing 1
hsa-miR-21-3p	PHYHIPL	phytanoyl-CoA 2-hydroxylase interacting protein like
hsa-miR-21-3p	ELL2	elongation factor for RNA polymerase II 2
hsa-miR-21-3p	RRAGB	Ras related GTP binding B
hsa-miR-21-3p	ZIC5	Zic family member 5
hsa-miR-21-3p	SERINC5	serine incorporator 5
hsa-miR-21-3p	SMAD7	SMAD family member 7
hsa-miR-21-3p	CAMSAP2	calmodulin regulated spectrin associated protein family member 2
hsa-miR-21-3p	OR10W1	olfactory receptor family 10 subfamily W member 1
hsa-miR-21-3p	CDK14	cyclin dependent kinase 14
hsa-miR-21-3p	SEH1L	SEH1 like nucleoporin
hsa-miR-21-3p	CPEB2	cytoplasmic polyadenylation element binding protein 2
hsa-miR-21-3p	TIAM1	T cell lymphoma invasion and metastasis 1
hsa-miR-21-3p	MAGEB18	MAGE family member B18
hsa-miR-21-3p	DDX4	DEAD-box helicase 4
hsa-miR-21-3p	SNRK	SNF related kinase
hsa-miR-21-3p	HS2ST1	heparan sulfate 2-O-sulfotransferase 1
hsa-miR-21-3p	PPP1R2	protein phosphatase 1 regulatory inhibitor subunit 2
hsa-miR-21-3p	GAD2	glutamate decarboxylase 2
hsa-miR-21-3p	TMEFF1	transmembrane protein with EGF like and two follistatin like domains 1
hsa-miR-21-3p	TMEM164	transmembrane protein 164
hsa-miR-21-3p	UMAD1	UBAP1-MVB12-associated (UMA) domain containing 1
hsa-miR-21-3p	RC3H1	ring finger and CCCH-type domains 1
hsa-miR-21-3p	SRSF2	serine and arginine rich splicing factor 2
hsa-miR-21-3p	ZC3H12C	zinc finger CCCH-type containing 12C
hsa-miR-21-3p	BCL2L11	BCL2 like 11
hsa-miR-21-3p	FAM83H	family with sequence similarity 83 member H
hsa-miR-21-3p	RTN3	reticulon 3
hsa-miR-21-3p	HSD17B11	hydroxysteroid 17-beta dehydrogenase 11
hsa-miR-21-3p	RIPOR3	RIPOR family member 3
hsa-miR-21-3p	FSBP	fibrinogen silencer binding protein
hsa-miR-21-3p	WDR33	WD repeat domain 33
hsa-miR-675-5p	RUNX1	runt related transcription factor 1
hsa-miR-675-5p	SYDE1	synapse defective Rho GTPase homolog 1
hsa-miR-675-5p	ZFP41	ZFP41 zinc finger protein
hsa-miR-675-5p	FANCA	FA complementation group A
hsa-miR-675-5p	PIP5K1B	phosphatidylinositol-4-phosphate 5-kinase type 1 beta
hsa-miR-675-5p	FBXO27	F-box protein 27
hsa-miR-675-5p	JMJD6	jumonji domain containing 6, arginine demethylase and lysine hydroxylase
hsa-miR-675-5p	CALN1	calneuron 1
hsa-miR-675-5p	LRIG2	leucine rich repeats and immunoglobulin like domains 2
hsa-miR-675-5p	TMEM176B	transmembrane protein 176B
hsa-miR-675-5p	DLL3	delta like canonical Notch ligand 3
hsa-miR-675-5p	OPA3	OPA3, outer mitochondrial membrane lipid metabolism regulator
hsa-miR-675-5p	CDKN2A	cyclin dependent kinase inhibitor 2A
hsa-miR-675-5p	ATP11A	ATPase phospholipid transporting 11A
hsa-miR-675-5p	RNF165	ring finger protein 165
hsa-miR-675-5p	G6PC3	glucose-6-phosphatase catalytic subunit 3
hsa-miR-675-5p	SNX22	sorting nexin 22
hsa-miR-675-5p	ADAM30	ADAM metallopeptidase domain 30
hsa-miR-675-5p	IGFBPL1	insulin like growth factor binding protein like 1
hsa-miR-675-5p	PHKG2	phosphorylase kinase catalytic subunit gamma 2
hsa-miR-675-5p	FBXL16	F-box and leucine rich repeat protein 16
hsa-miR-675-5p	NXNL2	nucleoredoxin like 2
hsa-miR-675-5p	MAPK4	mitogen-activated protein kinase 4
hsa-miR-675-5p	URM1	ubiquitin related modifier 1
hsa-miR-675-5p	UVSSA	UV stimulated scaffold protein A
hsa-miR-675-5p	GLIS3	GLIS family zinc finger 3
hsa-miR-675-5p	SUSD6	sushi domain containing 6
hsa-miR-675-5p	MAPK1	mitogen-activated protein kinase 1
hsa-miR-675-5p	DIDO1	death inducer-obliterator 1
hsa-miR-675-5p	CA6	carbonic anhydrase 6
hsa-miR-675-5p	CNTFR	ciliary neurotrophic factor receptor
hsa-miR-675-5p	NNAT	neuronatin
hsa-miR-675-5p	CHMP1A	charged multivesicular body protein 1A
hsa-miR-675-5p	ZNF385A	zinc finger protein 385A
hsa-miR-675-5p	OTUD4	OTU deubiquitinase 4
hsa-miR-675-5p	RBM38	RNA binding motif protein 38
hsa-miR-675-5p	PIGR	polymeric immunoglobulin receptor
hsa-miR-675-5p	RUBCN	rubicon autophagy regulator
hsa-miR-671-5p	USP46	ubiquitin specific peptidase 46
hsa-miR-671-5p	SATB2	SATB homeobox 2
hsa-miR-671-5p	CAMKK2	calcium/calmodulin dependent protein kinase kinase 2
hsa-miR-671-5p	AAK1	AP2 associated kinase 1
hsa-miR-671-5p	C16orf72	chromosome 16 open reading frame 72
hsa-miR-671-5p	TBL2	transducin beta like 2
hsa-miR-671-5p	ST8SIA5	ST8 alpha-N-acetyl-neuraminide alpha-2,8-sialyltransferase 5
hsa-miR-671-5p	CA7	carbonic anhydrase 7
hsa-miR-671-5p	VSNL1	visinin like 1
hsa-miR-671-5p	CFL2	cofilin 2
hsa-miR-671-5p	C12orf77	chromosome 12 open reading frame 77
hsa-miR-671-5p	KRT38	keratin 38
hsa-miR-671-5p	EDN1	endothelin 1
hsa-miR-671-5p	C10orf25	chromosome 10 open reading frame 25
hsa-miR-671-5p	SSBP1	single stranded DNA binding protein 1
hsa-miR-671-5p	CBS	cystathionine-beta-synthase
hsa-miR-671-5p	ACTR2	ARP2 actin related protein 2 homolog
hsa-miR-671-5p	KRT9	keratin 9
hsa-miR-671-5p	GID4	GID complex subunit 4 homolog
hsa-miR-671-5p	KCNMA1	potassium calcium-activated channel subfamily M alpha 1
hsa-miR-671-5p	SGK2	SGK2, serine/threonine kinase 2
hsa-miR-671-5p	KIT	KIT proto-oncogene receptor tyrosine kinase
hsa-miR-671-5p	RAG1	recombination activating 1
hsa-miR-671-5p	SLC30A6	solute carrier family 30 member 6
hsa-miR-671-5p	MAP3K19	mitogen-activated protein kinase kinase kinase 19
hsa-miR-671-5p	LIN9	lin-9 DREAM MuvB core complex component
hsa-miR-671-5p	ZNF805	zinc finger protein 805
hsa-miR-671-5p	FGFR2	fibroblast growth factor receptor 2
hsa-miR-671-5p	JADE1	jade family PHD finger 1
hsa-miR-671-5p	MARK1	microtubule affinity regulating kinase 1
hsa-miR-671-5p	GALNT10	polypeptide N-acetylgalactosaminyltransferase 10
hsa-miR-671-5p	FADS1	fatty acid desaturase 1
hsa-miR-671-5p	SPOCK1	SPARC (osteonectin), cwcv and kazal like domains proteoglycan 1
hsa-miR-671-5p	FOXP2	forkhead box P2
hsa-miR-671-5p	ADCY1	adenylate cyclase 1
hsa-miR-671-5p	SPTBN1	spectrin beta, non-erythrocytic 1
hsa-miR-671-5p	DVL3	dishevelled segment polarity protein 3
hsa-miR-671-5p	MAML2	mastermind like transcriptional coactivator 2
hsa-miR-671-5p	ACBD6	acyl-CoA binding domain containing 6
hsa-miR-671-5p	LOC102723360	uncharacterized LOC102723360
hsa-miR-671-5p	SPPL3	signal peptide peptidase like 3
hsa-miR-671-5p	LOC102724219	uncharacterized LOC102724219
hsa-miR-671-5p	LOC102724843	uncharacterized LOC102724843
hsa-miR-671-5p	LOC102724951	uncharacterized LOC102724951
hsa-miR-671-5p	LGALS3BP	galectin 3 binding protein
hsa-miR-671-5p	C9orf78	chromosome 9 open reading frame 78
hsa-miR-671-5p	WFDC6	WAP four-disulfide core domain 6
hsa-miR-671-5p	CFTR	cystic fibrosis transmembrane conductance regulator
hsa-miR-671-5p	SYPL2	synaptophysin like 2
hsa-miR-671-5p	SYNPR	synaptoporin
hsa-miR-146a-5p	TRAF6	TNF receptor associated factor 6
hsa-miR-146a-5p	IRAK1	interleukin 1 receptor associated kinase 1
hsa-miR-146a-5p	SEC23IP	SEC23 interacting protein
hsa-miR-146a-5p	NOVA1	NOVA alternative splicing regulator 1
hsa-miR-146a-5p	WWC2	WW and C2 domain containing 2
hsa-miR-146a-5p	UPP2	uridine phosphorylase 2
hsa-miR-146a-5p	PPP1R11	protein phosphatase 1 regulatory inhibitor subunit 11
hsa-miR-146a-5p	BCORL1	BCL6 corepressor like 1
hsa-miR-146a-5p	SORT1	sortilin 1
hsa-miR-146a-5p	ZNF649	zinc finger protein 649
hsa-miR-146a-5p	PLSCR4	phospholipid scramblase 4
hsa-miR-146a-5p	NUMB	NUMB, endocytic adaptor protein
hsa-miR-146a-5p	USP32	ubiquitin specific peptidase 32
hsa-miR-146a-5p	APPL1	adaptor protein, phosphotyrosine interacting with PH domain and leucine zipper 1
hsa-miR-146a-5p	ZNF652	zinc finger protein 652
hsa-miR-146a-5p	SIAH2	siah E3 ubiquitin protein ligase 2
hsa-miR-146a-5p	SRSF6	serine and arginine rich splicing factor 6
hsa-miR-146a-5p	CARD10	caspase recruitment domain family member 10
hsa-miR-146a-5p	GDAP1L1	ganglioside induced differentiation associated protein 1 like 1
hsa-miR-146a-5p	EIF4G2	eukaryotic translation initiation factor 4 gamma 2
hsa-miR-146a-5p	GRIA3	glutamate ionotropic receptor AMPA type subunit 3
hsa-miR-146a-5p	MRS2	magnesium transporter MRS2
hsa-miR-146a-5p	ZNF354B	zinc finger protein 354B
hsa-miR-146a-5p	SLC10A3	solute carrier family 10 member 3
hsa-miR-146a-5p	ZNF540	zinc finger protein 540
hsa-miR-146a-5p	C9orf72	chromosome 9 open reading frame 72
hsa-miR-146a-5p	TDRKH	tudor and KH domain containing
hsa-miR-146a-5p	DDHD1	DDHD domain containing 1
hsa-miR-146a-5p	BRK1	BRICK1, SCAR/WAVE actin nucleating complex subunit
hsa-miR-146a-5p	LOC388813	uncharacterized protein ENSP00000383407-like
hsa-miR-146a-5p	POFUT2	protein O-fucosyltransferase 2
hsa-miR-146a-5p	NEMP1	nuclear envelope integral membrane protein 1
hsa-miR-146a-5p	DCAF12	DDB1 and CUL4 associated factor 12
hsa-miR-146a-5p	ZBTB2	zinc finger and BTB domain containing 2
hsa-miR-146a-5p	CD80	CD80 molecule
hsa-miR-146a-5p	CXXC4	CXXC finger protein 4
hsa-miR-146a-5p	FBXW2	F-box and WD repeat domain containing 2
hsa-miR-146a-5p	USP6	ubiquitin specific peptidase 6
hsa-miR-146a-5p	ABL2	ABL proto-oncogene 2, non-receptor tyrosine kinase
hsa-miR-146a-5p	HNRNPD	heterogeneous nuclear ribonucleoprotein D
hsa-miR-146a-5p	KCNJ16	potassium voltage-gated channel subfamily J member 16
hsa-miR-146a-5p	MMP16	matrix metallopeptidase 16
hsa-miR-146a-5p	FOXR2	forkhead box R2
hsa-miR-146a-5p	CTAGE4	CTAGE family member 4
hsa-miR-146a-5p	HIPK3	homeodomain interacting protein kinase 3
hsa-miR-146a-5p	CTAGE9	CTAGE family member 9
hsa-miR-146a-5p	RHOBTB3	Rho related BTB domain containing 3
hsa-miR-146a-5p	RARB	retinoic acid receptor beta
hsa-miR-146a-5p	CTAGE8	CTAGE family member 8
hsa-miR-146a-5p	VASN	vasorin
hsa-miR-489-3p	SHISA7	shisa family member 7
hsa-miR-489-3p	NRIP1	nuclear receptor interacting protein 1
hsa-miR-489-3p	ACKR4	atypical chemokine receptor 4
hsa-miR-489-3p	SUZ12	SUZ12, polycomb repressive complex 2 subunit
hsa-miR-489-3p	TENT2	terminal nucleotidyltransferase 2
hsa-miR-489-3p	ANKRD49	ankyrin repeat domain 49
hsa-miR-489-3p	PKP1	plakophilin 1
hsa-miR-489-3p	RIPK4	receptor interacting serine/threonine kinase 4
hsa-miR-489-3p	ATP1B3	ATPase Na+/K+ transporting subunit beta 3
hsa-miR-489-3p	UBE4A	ubiquitination factor E4A
hsa-miR-489-3p	EMX2	empty spiracles homeobox 2
hsa-miR-489-3p	CCAR1	cell division cycle and apoptosis regulator 1
hsa-miR-489-3p	ADAM23	ADAM metallopeptidase domain 23
hsa-miR-489-3p	PRXL2A	peroxiredoxin like 2A
hsa-miR-489-3p	RNF111	ring finger protein 111
hsa-miR-489-3p	SRSF7	serine and arginine rich splicing factor 7
hsa-miR-489-3p	KLHL13	kelch like family member 13
hsa-miR-489-3p	PAX3	paired box 3
hsa-miR-489-3p	ITGB1BP1	integrin subunit beta 1 binding protein 1
hsa-miR-489-3p	TNFSF4	TNF superfamily member 4
hsa-miR-489-3p	JAG1	jagged 1
hsa-miR-489-3p	IL13	interleukin 13
hsa-miR-489-3p	PARM1	prostate androgen-regulated mucin-like protein 1
hsa-miR-489-3p	RECK	reversion inducing cysteine rich protein with kazal motifs
hsa-miR-489-3p	PNISR	PNN interacting serine and arginine rich protein
hsa-miR-489-3p	MNS1	meiosis specific nuclear structural 1
hsa-miR-489-3p	TENT4B	terminal nucleotidyltransferase 4B
hsa-miR-489-3p	RICTOR	RPTOR independent companion of MTOR complex 2
hsa-miR-489-3p	LONRF2	LON peptidase N-terminal domain and ring finger 2
hsa-miR-489-3p	TCEAL6	transcription elongation factor A like 6
hsa-miR-489-3p	SLIT2	slit guidance ligand 2
hsa-miR-489-3p	RELCH	RAB11 binding and LisH domain, coiled-coil and HEAT repeat containing
hsa-miR-489-3p	TRAM1	translocation associated membrane protein 1
hsa-miR-489-3p	RASGEF1B	RasGEF domain family member 1B
hsa-miR-489-3p	SCIN	scinderin
hsa-miR-489-3p	RTN4IP1	reticulon 4 interacting protein 1
hsa-miR-489-3p	AIG1	androgen induced 1
hsa-miR-489-3p	LVRN	laeverin
hsa-miR-489-3p	RPP30	ribonuclease P/MRP subunit p30
hsa-miR-489-3p	UPF3B	UPF3B, regulator of nonsense mediated mRNA decay
hsa-miR-489-3p	IQSEC3	IQ motif and Sec7 domain 3
hsa-miR-489-3p	DCC	DCC netrin 1 receptor
hsa-miR-489-3p	DCAF13	DDB1 and CUL4 associated factor 13
hsa-miR-489-3p	NF2	neurofibromin 2
hsa-miR-489-3p	PPARGC1B	PPARG coactivator 1 beta
hsa-miR-489-3p	PLPP6	phospholipid phosphatase 6
hsa-miR-489-3p	HSF5	heat shock transcription factor 5
hsa-miR-489-3p	SRSF1	serine and arginine rich splicing factor 1
hsa-miR-489-3p	EFCAB11	EF-hand calcium binding domain 11
hsa-miR-489-3p	B4GALT3	beta-1,4-galactosyltransferase 3
hsa-miR-6125	YTHDF2	YTH N6-methyladenosine RNA binding protein 2
hsa-miR-6125	MROH2A	maestro heat like repeat family member 2A
hsa-miR-6125	KIF6	kinesin family member 6
hsa-miR-6125	KIAA0232	KIAA0232
hsa-miR-6125	EIF4EBP1	eukaryotic translation initiation factor 4E binding protein 1
hsa-miR-6125	TRIM41	tripartite motif containing 41
hsa-miR-6125	SLC6A12	solute carrier family 6 member 12
hsa-miR-6125	BCORL1	BCL6 corepressor like 1
hsa-miR-6125	USP35	ubiquitin specific peptidase 35
hsa-miR-6125	FAIM2	Fas apoptotic inhibitory molecule 2
hsa-miR-6125	ADAM32	ADAM metallopeptidase domain 32
hsa-miR-6125	FAM129C	family with sequence similarity 129 member C
hsa-miR-6125	UBE3B	ubiquitin protein ligase E3B
hsa-miR-6125	FAM228A	family with sequence similarity 228 member A
hsa-miR-6125	AMD1	adenosylmethionine decarboxylase 1
hsa-miR-6125	PALM	paralemmin
hsa-miR-6125	MMP28	matrix metallopeptidase 28
hsa-miR-6125	PHIP	pleckstrin homology domain interacting protein
hsa-miR-6125	CFAP97	cilia and flagella associated protein 97
hsa-miR-6125	CSMD1	CUB and Sushi multiple domains 1
hsa-miR-6125	ZNF124	zinc finger protein 124
hsa-miR-6125	ADAMTS5	ADAM metallopeptidase with thrombospondin type 1 motif 5
hsa-miR-6125	CLDN9	claudin 9
hsa-miR-6125	ISCU	iron-sulfur cluster assembly enzyme
hsa-miR-6125	POM121C	POM121 transmembrane nucleoporin C
hsa-miR-6125	ARMH4	armadillo-like helical domain containing 4
hsa-miR-6125	AIPL1	aryl hydrocarbon receptor interacting protein like 1
hsa-miR-6125	BCL7A	BCL7A, BAF complex component
hsa-miR-6125	MZF1	myeloid zinc finger 1
hsa-miR-6125	GPCPD1	glycerophosphocholine phosphodiesterase 1
hsa-miR-6125	STRN3	striatin 3
hsa-miR-6125	TMEM52B	transmembrane protein 52B
hsa-miR-6125	BICD2	BICD cargo adaptor 2
hsa-miR-6125	CNNM3	cyclin and CBS domain divalent metal cation transport mediator 3
hsa-miR-6125	N4BP1	NEDD4 binding protein 1
hsa-miR-6125	C14orf119	chromosome 14 open reading frame 119
hsa-miR-6125	ARHGEF28	Rho guanine nucleotide exchange factor 28
hsa-miR-6125	AP4M1	adaptor related protein complex 4 subunit mu 1
hsa-miR-6125	AGO2	argonaute RISC catalytic component 2
hsa-miR-6125	KLF6	Kruppel like factor 6
hsa-miR-6125	KLF4	Kruppel like factor 4
hsa-miR-6125	NDUFA10	NADH:ubiquinone oxidoreductase subunit A10
hsa-miR-6125	USP12	ubiquitin specific peptidase 12
hsa-miR-6125	C2CD4B	C2 calcium dependent domain containing 4B
hsa-miR-6125	BAD	BCL2 associated agonist of cell death
hsa-miR-6125	NTPCR	nucleoside-triphosphatase, cancer-related
hsa-miR-6125	KRT40	keratin 40
hsa-miR-6125	DLK1	delta like non-canonical Notch ligand 1
hsa-miR-6125	LMBR1	limb development membrane protein 1
hsa-miR-6125	ENAH	ENAH, actin regulator
hsa-miR-6125	ZNF135	zinc finger protein 135
hsa-miR-6125	ZNF275	zinc finger protein 275
hsa-miR-6125	VEZF1	vascular endothelial zinc finger 1
hsa-miR-6125	SCN7A	sodium voltage-gated channel alpha subunit 7
hsa-miR-6125	SEC14L3	SEC14 like lipid binding 3
hsa-miR-6125	NRG1	neuregulin 1
hsa-miR-4638-3p	TRIL	TLR4 interactor with leucine rich repeats
hsa-miR-4638-3p	PEX11A	peroxisomal biogenesis factor 11 alpha
hsa-miR-4638-3p	NFIA	nuclear factor I A
hsa-miR-4638-3p	DISC1	DISC1 scaffold protein
hsa-miR-4638-3p	EDRF1	erythroid differentiation regulatory factor 1
hsa-miR-4638-3p	POMGNT1	protein O-linked mannose N-acetylglucosaminyltransferase 1 (beta 1,2-)
hsa-miR-4638-3p	ATXN1	ataxin 1
hsa-miR-4638-3p	KCNC3	potassium voltage-gated channel subfamily C member 3
hsa-miR-4638-3p	SETD3	SET domain containing 3, actin histidine methyltransferase
hsa-miR-4638-3p	WDR37	WD repeat domain 37
hsa-miR-4638-3p	XRN1	5'-3' exoribonuclease 1
hsa-miR-4638-3p	YY1	YY1 transcription factor
hsa-miR-4638-3p	GALNT3	polypeptide N-acetylgalactosaminyltransferase 3
hsa-miR-4638-3p	MAL2	mal, T cell differentiation protein 2 (gene/pseudogene)
hsa-miR-4638-3p	GLOD4	glyoxalase domain containing 4
hsa-miR-4638-3p	THRB	thyroid hormone receptor beta
hsa-miR-4638-3p	NKAP	NFKB activating protein
hsa-miR-4638-3p	CAMK1D	calcium/calmodulin dependent protein kinase ID
hsa-miR-4638-3p	TOLLIP	toll interacting protein
hsa-miR-4638-3p	WDR17	WD repeat domain 17
hsa-miR-4638-3p	POLR2G	RNA polymerase II subunit G
hsa-miR-4638-3p	C5orf63	chromosome 5 open reading frame 63
hsa-miR-4638-3p	RALGAPB	Ral GTPase activating protein non-catalytic beta subunit
[truncated: 653 more rows]
